# Supplementary material
Source: PubMed Central journal article supplement (PMC3528601)
Supplement: 1118589109_sfig01.pdf [file 1118589109_sfig01.pdf]

Fig. S1

**A**

Otdsxf1 ATGTCCGATCAACAGGATTACGAGACGAAAAATGGACCTAAACCGCTCTAGTACATCGAGCAGTCCGAGGACACCGCCAAATTGCGCTCGA  
Otdsxf2 ATGTCCGATCAACAGGATTACGAGACGAAAAATGGACCTAAACCGCTCTAGTACATCGAGCAGTCCGAGGACACCGCCAAATTGCGCTCGA  
Otdsxf3 ATGTCCGATCAACAGGATTACGAGACGAAAAATGGACCTAAACCGCTCTAGTACATCGAGCAGTCCGAGGACACCGCCAAATTGCGCTCGA  
Otdsxf4 ATGTCCGATCAACAGGATTACGAGACGAAAAATGGACCTAAACCGCTCTAGTACATCGAGCAGTCCGAGGACACCGCCAAATTGCGCTCGA  
Otdsxf5 ATGTCCGATCAACAGGATTACGAGACGAAAAATGGACCTAAACCGCTCTAGTACATCGAGCAGTCCGAGGACACCGCCAAATTGCGCTCGA  
Otdsxm ATGTCCGATCAACAGGATTACGAGACGAAAAATGGATCTAAACCGCTCTAGTACATCGAGCAGTCCGAGGACACCGCCAAATTGCGCTCGA  
Otdsxb ATGTCCGATCAACAGGATTACGAGACGAAAAATGGACCTAAACCGCTCTAGTACATCGAGCAGTCCGAGGACACCGCCAAATTGCGCTCGA

Otdsxf1 TGTAGAAATCACCGGTAAAAGTCCCCTGAAGGGCCATAAAAAGATACTGTAAGTACAGGCATTGCAAGTGTGAAAAATGCCGGCTTACG  
Otdsxf2 TGTAGAAATCACCGGTAAAAGTCCCCTGAAGGGCCATAAAAAGATACTGTAAGTACAGGCATTGCAAGTGTGAAAAATGCCGGCTTACG  
Otdsxf3 TGTAGAAATCACCGGTAAAAGTCCCCTGAAGGGCCATAAAAAGATACTGTAAGTACAGGCATTGCAAGTGTGAAAAATGCCGGCTTACG  
Otdsxf4 TGTAGAAATCACCGGTAAAAGTCCCCTGAAGGGCCATAAAAAGATACTGTAAGTACAGGCATTGCAAGTGTGAAAAATGCCGGCTTACG  
Otdsxf5 TGTAGAAATCACCGGTAAAAGTCCCCTGAAGGGCCATAAAAAGATACTGTAAGTACAGGCATTGCAAGTGTGAAAAATGCCGGCTTACG  
Otdsxm TGTAGAAATCACCGGTAAAAGTCCCCTGAAGGGCCATAAAAAGATACTGTAAGTACAGGCATTGCAAGTGTGAAAAATGCCGGCTTACG  
Otdsxb TGTAGAAATCACCGGTAAAAGTCCCCTGAAGGGCCATAAAAAGATACTGTAAGTACAGGCATTGCAAGTGTGAAAAATGCCGGCTTACG

Otdsxf1 TCCGAAAGACAGAGAGTGATGGCAATGCAAACCGCACTTCGTCGAGCACAAGCTCAAGACGAAGCAATGTTAAGGCAAGGGGTGATTCCC  
Otdsxf2 TCCGAAAGACAGAGAGTGATGGCAATGCAAACCGCACTTCGTCGAGCACAAGCTCAAGACGAAGCAATGTTAAGGCAAGGGGTGATTCCC  
Otdsxf3 TCCGAAAGACAGAGAGTGATGGCAATGCAAACCGCACTTCGTCGAGCACAAGCTCAAGACGAAGCAATGTTAAGGCAAGGGGTGATTCCC  
Otdsxf4 TCCGAAAGACAGAGAGTGATGGCAATGCAAACCGCACTTCGTCGAGCACAAGCTCAAGACGAAGCAATGTTAAGGCAAGGGGTGATTCCC  
Otdsxf5 TCCGAAAGACAGAGAGTGATGGCAATGCAAACCGCACTTCGTCGAGCACAAGCTCAAGACGAAGCAATGTTAAGGCAAGGGGTGATTCCC  
Otdsxm TCCGAAAGACAGAGAGTGATGGCAATGCAAACCGCACTTCGTCGAGCACAAGCTCAAGACGAAGCAATGTTAAGGCAAGGGGTGATTCCC  
Otdsxb TCCGAAAGACAGAGAGTGATGGCAATGCAAACCGCACTTCGTCGAGCACAAGCTCAAGACGAAGCAATGTTAAGGCAAGGGGTGATTCCC

Otdsxf1 CAATCGAAAAGCCCTGCACCGCTTCATAGTGGCCCCGACCGAACATACGAATGTGAATCACCAGGATCTTCATCAACACCAACTTTTCCG  
Otdsxf2 CAATCGAAAAGCCCTGCACCGCTTCATAGTGGCCCCGACCGAACATACGAATGTGAATCACCAGGATCTTCATCAACACCAACTTTTCCG  
Otdsxf3 CAATCGAAAAGCCCTGCACCGCTTCATAGTGGCCCCGACCGAACATACGAATGTGAATCACCAGGATCTTCATCAACACCAACTTTTCCG  
Otdsxf4 CAATCGAAAAGCCCTGCACCGCTTCATAGTGGCCCCGACCGAACATACGAATGTGAATCACCAGGATCTTCATCAACACCAACTTTTCCG  
Otdsxf5 CAATCGAAAAGCCCTGCACCGCTTCATAGTGGCCCCGACCGAACATACGAATGTGAATCACCAGGATCTTCATCAACACCAACTTTTCCG  
Otdsxm CAATCGAAAAGCCCTGCACCGCTTCATAGTGGCCCCGACCGAACATACGAATGTGAATCACCAGGATCTTCATCAACACCAACTTTTCCG  
Otdsxb CAATCGAAAAGCCCTGCACCGCTTCATAGTGGCCCCGACCGAACATACGAATGTGAATCACCAGGATCTTCATCAACACCAACTTTTCCG

Otdsxf1 GAAGTTGTCAGGAAAGCGCCGATGGAACCAATCAGAGATAAATTTGGGGAATAACAATATTGGCCAAAAAGATTTAATTCAAGAAAGCTTA  
Otdsxf2 GAAGTTGTCAGGAAAGCGCCGATGGAACCAATCAGAGATAAATTTGGGGAATAACAATATTGGCCAAAAAGATTTAATTCAAGAAAGCTTA  
Otdsxf3 GAAGTTGTCAGGAAAGCGCCGATGGAACCAATCAGAGATAAATTTGGGGAATAACAATATTGGCCAAAAAGATTTAATTCAAGAAAGCTTA  
Otdsxf4 GAAGTTGTCAGGAAAGCGCCGATGGAACCAATCAGAGATAAATTTGGGGAATAACAATATTGGCCAAAAAGATTTAATTCAAGAAAGCTTA  
Otdsxf5 GAAGTTGTCAGGAAAGCGCCGATGGAACCAATCAGAGATAAATTTGGGGAATAACAATATTGGCCAAAAAGATTTAATTCAAGAAAGCTTA  
Otdsxm GAAGTTGTCAGGAAAGCGCCGATGGAACCAATCAGAGATAAATTTGGGGAATAACAATATTGGCCAAAAAGATTTAATTCAAGAAAGCTTA  
Otdsxb GAAGTTGTCAGGAAAGCGCCGATGGAACCAATCAGAGATAAATTTGGGGAATAACA-----

Otdsxf1 CAACTATTAGAAAAGTTCCGATATTCGTGGGAAATGATGCCATTGATTTATGCGATAGTCAAAGACACTCCAGATCTCGAAGAAGCGTCA  
Otdsxf2 CAACTATTAGAAAAGTTCCGATATTCGTGGGAAATGATGCCATTGATTTATGCGATAGTCAAAGACACTCCAGATCTCGAAGAAGCGTCA  
Otdsxf3 CAACTATTAGAAAAGTTCCGATATTCGTGGGAAATGATGCCATTGATTTATGCGATAGTCAAAGACACTCCAGATCTCGAAGAAGCGTCA  
Otdsxf4 CAACTATTAGAAAAGTTCCGATATTCGTGGGAAATGATGCCATTGATTTATGCGATAGTCAAAGACACTCCAGATCTCGAAGAAGCGTCA  
Otdsxf5 CAACTATTAGAAAAGTTCCGATATTCGTGGGAAATGATGCCATTGATTTATGCGATAGTCAAAGACACTCCAGATCTCGAAGAAGCGTCA  
Otdsxm CAACTATTAGAAAAGTTCCGATATTCGTGGGAAATGATGCCATTGATTTATGCGATAGTCAAAGACACTCCAGATCTCGAAGAAGCGTCA  
Otdsxb -----

Otdsxf1 AAACGTATAGATGAAGGGCAAAGGGCAGTGAAGGAATACTCAATAATCAACAACCTCAACATGTACGACGGTGGAGAGCTACGTTATCCT  
Otdsxf2 AAACGTATAGATGAAGGGCAAAGGGCAGTGAAGGAATACTCAATAATCAACAACCTCAACATGTACGACGGTGGAGAGCTACGTTATCCT  
Otdsxf3 AAACGTATAGATGAAGGGCAAAGGGCAGTGAAGGAATACTCAATAATCAACAACCTCAACATGTACGACGGTGGAGAGCTACGTTATCCT  
Otdsxf4 AAACGTATAGATGAAGGGCAAAGGGCAGTGAAGGAATACTCAATAATCAACAACCTCAACATGTACGACGGTGGAGAGCTACGTTATCCT  
Otdsxf5 AAACGTATAGATGAAGGGCAAAGGGCAGTGAAGGAATACTCAATAATCAACAACCTCAACATGTACGACGGTGGAGAGCTACGTTATCCT  
Otdsxm AAACGTATAGATGAAGG-----  
Otdsxb -----

Otdsxf1 ACTCGTCAGTATGGATGATTAAGATTTAAAAATATTTCAATACAATAAAAAAGTATCCATAAGAGTCAACTTTAAATATTTTTTAATAA  
Otdsxf2 ACTC-----  
Otdsxf3 ACTC-----  
Otdsxf4 ACTC-----  
Otdsxf5 ACTC-----  
Otdsxm -----  
Otdsxb -----

Otdsxf1 CTTTTACACTAAAAATAACAATTTTTTCATCTTCTCTTTATTTCTTCGATAAATAATAATTTTTTTAGTAGTAATGCATGTTTTTTCTG  
Otdsxf2 -----  
Otdsxf3 -----  
Otdsxf4 -----  
Otdsxf5 -----  
Otdsxm -----  
Otdsxb -----

Otdsxf1 CATTTTGTTTTCCAACAACATAGATAAGAGGGCGCAAGAACGACGATCTTCCGGGACCTTCAAACCAATCGGCGGCGTTAATCTTCAGGTG  
Otdsxf2 -----ATAAGAGGGCGCAAGAACGACGATCTTCCGGGACCTTCAAACCAATCGGCGGCGTTAATCTTCAGGTG  
Otdsxf3 -----ATAAGAGGGCGCAAGAACGACGATCTTCCGGGACCTTCAAACCAATCGGCGGCGTTAATCTTCAG---  
Otdsxf4 -----ATAAGAGGGCGCAAGAACGACGATCTTCCGGGACCTTCAAACCAATCGGCGGCGTTAATCTTCAG---  
Otdsxf5 -----ATAAGAGGGCGCAAGAACGACGATCTTCCGGGACCTTCAAACCAATCGGCGGCGTTAATCTTCAG---  
Otdsxm -----  
Otdsxb -----

Otdsxf1 AAACGCAACTTACACGTTAAATAAGGATATCATCATTACCGTATAGTTAAAAATTAGATTTTTAGCGTTTAAATGATTCAAACCTGGCTTT  
Otdsxf2 AAACGCAACTTACACGTTAAATAAGGATATCATCATTACCGTATAGTTAAAAATTAGATTTTTAGCGTTTAAATGATTCAAACCTGGCTTT  
Otdsxf3 -----TTAAAAATTAGATTTTTAGCGTTTAAATGATTCAAACCTGGCTTT  
Otdsxf4 -----ATTTTTAGCGTTTAAATGATTCAAACCTGGCTTT  
Otdsxf5 -----CGTTTAAATGATTCAAACCTGGCTTT  
Otdsxm -----  
Otdsxb -----

Otdsxf1 ATTAATACAAAAAGAATGATCCGGCCTTAACGAAGAGTATTATTACAATAAATTTAATGTAGAAAACCTCAAGTGTAAAATATAA  
Otdsxf2 ATTAATACAAAAAGAATGATCCGGCCTTAACGAAGAGTATTATTACAATAAATTTAATGTAGAAAACCTCAAGTGTAAAATATAA  
Otdsxf3 ATTAATACAAAAAGAATGATCCGGCCTTAACGAAGAGTATTATTACAATAAATTTAATGTAGAAAACCTCAAGTGTAAAATATAA  
Otdsxf4 ATTAATACAAAAAGAATGATCCGGCCTTAACGAAGAGTATTATTACAATAAATTTAATGTAGAAAACCTCAAGTGTAAAATATAA  
Otdsxf5 ATTAATACAAAAAGAATGATCCGGCCTTAACGAAGAGTATTATTACAATAAATTTAATGTAGAAAACCTCAAGTGTAAAATATAA  
Otdsxm -----  
Otdsxb -----

Otdsxf1 TTATTAAGACTACATATTAAGCCAATTTTTTATGAATCAGTATTTTTTAACGAAGAAGCCTCAATTATTTTGCTTATAAGTATTACATAT  
Otdsxf2 TTATTAAGACTACATATTAAGCCAATTTTTTATGAATCAGTATTTTTTAACGAAGAAGCCTCAATTATTTTGCTTATAAGTATTACATAT  
Otdsxf3 TTATTAAGACTACATATTAAGCCAATTTTTTATGAATCAGTATTTTTTAACGAAGAAGCCTCAATTATTTTGCTTATAAGTATTACATAT  
Otdsxf4 TTATTAAGACTACATATTAAGCCAATTTTTTATGAATCAGTATTTTTTAACGAAGAAGCCTCAATTATTTTGCTTATAAGTATTACATAT  
Otdsxf5 TTATTAAGACTACATATTAAGCCAATTTTTTATGAATCAGTATTTTTTAACGAAGAAGCCTCAATTATTTTGCTTATAAGTATTACATAT  
Otdsxm -----  
Otdsxb -----

Otdsxf1 TCTTTGCGGCATTATTACATTAATTTATCTGCGCACCTATTATCAACAAAAACGTATAATAAAGGTAGAGATGCTGAACAACCTGGTGGAT  
Otdsxf2 TCTTTGCGGCATTATTACATTAATTTATCTGCGCACCTATTATCAACAAAAACGTATAATAAAGGTAGAGATGCTGAACAACCTGGTGGAT  
Otdsxf3 TCTTTGCGGCATTATTACATTAATTTATCTGCGCACCTATTATCAACAAAAACGTATAATAAAGGTAGAGATGCTGAACAACCTGGTGGAT  
Otdsxf4 TCTTTGCGGCATTATTACATTAATTTATCTGCGCACCTATTATCAACAAAAACGTATAATAAAGGTAGAGATGCTGAACAACCTGGTGGAT  
Otdsxf5 TCTTTGCGGCATTATTACATTAATTTATCTGCGCACCTATTATCAACAAAAACGTATAATAAAGGTAGAGATGCTGAACAACCTGGTGGAT  
Otdsxm -----TAGAGATGCTGAACAACCTGGTGGAT  
Otdsxb -----

Otdsxf1 TTTTTAATAAAAAATAAAGGATAGGTTTCACTTATCCTGGAAAATGATCTCACTTATCCACGTCATCCTAAAGAACGCTAAGGACGATCAG  
Otdsxf2 TTTTTAATAAAAAATAAAGGATAGGTTTCACTTATCCTGGAAAATGATCTCACTTATCCACGTCATCCTAAAGAACGCTAAGGACGATCAG  
Otdsxf3 TTTTTAATAAAAAATAAAGGATAGGTTTCACTTATCCTGGAAAATGATCTCACTTATCCACGTCATCCTAAAGAACGCTAAGGACGATCAG  
Otdsxf4 TTTTTAATAAAAAATAAAGGATAGGTTTCACTTATCCTGGAAAATGATCTCACTTATCCACGTCATCCTAAAGAACGCTAAGGACGATCAG  
Otdsxf5 TTTTTAATAAAAAATAAAGGATAGGTTTCACTTATCCTGGAAAATGATCTCACTTATCCACGTCATCCTAAAGAACGCTAAGGACGATCAG  
Otdsxm TTTTTAATAAAAAATAAAGGATAGGTTTCACTTATCCTGGAAAATGATCTCACTTATCCACGTCATCCTAAAGAACGCTAAGGACGATCAG  
Otdsxb -----

Otdsxf1 GAGAAAGCTTTTAGACAAATCGATGAAGCATTCTGGAGGTACAGGCTTTAGCAAATACTATCCAACACCGGTTAACCTCATCACTGAC  
Otdsxf2 GAGAAAGCTTTTAGACAAATCGATGAAGCATTCTGGAGGTACAGGCTTTAGCAAATACTATCCAACACCGGTTAACCTCATCACTGAC  
Otdsxf3 GAGAAAGCTTTTAGACAAATCGATGAAGCATTCTGGAGGTACAGGCTTTAGCAAATACTATCCAACACCGGTTAACCTCATCACTGAC  
Otdsxf4 GAGAAAGCTTTTAGACAAATCGATGAAGCATTCTGGAGGTACAGGCTTTAGCAAATACTATCCAACACCGGTTAACCTCATCACTGAC  
Otdsxf5 GAGAAAGCTTTTAGACAAATCGATGAAGCATTCTGGAGGTACAGGCTTTAGCAAATACTATCCAACACCGGTTAACCTCATCACTGAC  
Otdsxm GAGAAAGCTTTTAGACAAATCGATGAAGCATTCTGGAGGTACAGGCTTTAGCAAATACTATCCAACACCGGTTAACCTCATCACTGAC  
Otdsxb -----

Otdsxf1 CCATGGAGATGGTATTCACCTACAGCACTTTACCCGGCGATGTA CTACTATCAACTACCTAATACCTTCTTGGAATATTCCACCGAGTCCA  
Otdsxf2 CCATGGAGATGGTATTCACCTACAGCACTTTACCCGGCGATGTA CTACTATCAACTACCTAATACCTTCTTGGAATATTCCACCGAGTCCA  
Otdsxf3 CCATGGAGATGGTATTCACCTACAGCACTTTACCCGGCGATGTA CTACTATCAACTACCTAATACCTTCTTGGAATATTCCACCGAGTCCA  
Otdsxf4 CCATGGAGATGGTATTCACCTACAGCACTTTACCCGGCGATGTA CTACTATCAACTACCTAATACCTTCTTGGAATATTCCACCGAGTCCA  
Otdsxf5 CCATGGAGATGGTATTCACCTACAGCACTTTACCCGGCGATGTA CTACTATCAACTACCTAATACCTTCTTGGAATATTCCACCGAGTCCA  
Otdsxm CCATGGAGATGGTATTCACCTACAGCACTTTACCCGGCGATGTA CTACTATCAACTACCTAATACCTTCTTGGAATATTCCACCGAGTCCA  
Otdsxb -----

Otdsxf1 CCTTTACATTACCGGTACCACCCCAAGACCTAGAAGTAGAGCGTGA  
Otdsxf2 CCTTTACATTACCGGTACCACCCCAAGACCTAGAAGTAGAGCGTGA  
Otdsxf3 CCTTTACATTACCGGTACCACCCCAAGACCTAGAAGTAGAGCGTGA  
Otdsxf4 CCTTTACATTACCGGTACCACCCCAAGACCTAGAAGTAGAGCGTGA  
Otdsxf5 CCTTTACATTACCGGTACCACCCCAAGACCTAGAAGTAGAGCGTGA  
Otdsxm CCTTTACATTACCGGTACCACCCCAAGACCTAGAAGTAGAGCGTGA  
Otdsxb -----GTAAGTACTTTTACAATTTTTTTGTTAAAAGCTTTATTTATC

Otdsxb GCTGTGAATTAATTTATTTTTTAAAAGTACATATCAAATCAAAGGATTAAGGTGTACAAC TGAAACTATATAAGTAAAACTCTAATAC  
Otdsxb CATCACTAATACCTTAAGTATTTATCAACTATTCAAATTAATGACTTGCAACGAAAAAAGCAGTTTTAATACTTTATAATTACAC  
Otdsxb CTTTTCATTTAAGCAGTAGTAAGTGTATTTAATTTGAGTGTATTAATAAATTTAATTTTGTATTTATTAAGTTATAATTTATGACAATA  
Otdsxb TGTCGTTTTGATAAATTTGTGTAAAATAGTGAGATCTTAAGCAGTAAGAGATCGTATCCTTAATGAGATAGAAGGTAATTTATAGGTTAA  
Otdsxb AGC

**B**

|         |     |                                  |                                      |                                 |                              |     |
|---------|-----|----------------------------------|--------------------------------------|---------------------------------|------------------------------|-----|
| OtDsxF1 | 1   | MSDQQDYETKMDLNASSTSSSPRT         | PPNCARCRNHRVKVPLKGHKRYCKYRHCKCEKCRLT | SERQRMAMQ                       | TALRRAQAQDEAMLRQGVIP         | 90  |
| OtDsxF2 | 1   | MSDQQDYETKMDLNASSTSSSPRT         | PPNCARCRNHRVKVPLKGHKRYCKYRHCKCEKCRLT | SERQRMAMQ                       | TALRRAQAQDEAMLRQGVIP         | 90  |
| OtDsxF3 | 1   | MSDQQDYETKMDLNASSTSSSPRT         | PPNCARCRNHRVKVPLKGHKRYCKYRHCKCEKCRLT | SERQRMAMQ                       | TALRRAQAQDEAMLRQGVIP         | 90  |
| OtDsxF4 | 1   | MSDQQDYETKMDLNASSTSSSPRT         | PPNCARCRNHRVKVPLKGHKRYCKYRHCKCEKCRLT | SERQRMAMQ                       | TALRRAQAQDEAMLRQGVIP         | 90  |
| OtDsxF5 | 1   | MSDQQDYETKMDLNASSTSSSPRT         | PPNCARCRNHRVKVPLKGHKRYCKYRHCKCEKCRLT | SERQRMAMQ                       | TALRRAQAQDEAMLRQGVIP         | 90  |
| OtDsxM  | 1   | MSDQQDYETKMDLNASSTSSSPRT         | PPNCARCRNHRVKVPLKGHKRYCKYRHCKCEKCRLT | SERQRMAMQ                       | TALRRAQAQDEAMLRQGVIP         | 90  |
| OtDSXB  | 1   | MSDQQDYETKMDLNASSTSSSPRT         | PPNCARCRNHRVKVPLKGHKRYCKYRHCKCEKCRLT | SERQRMAMQ                       | TALRRAQAQDEAMLRQGVIP         | 90  |
|         |     |                                  |                                      |                                 |                              |     |
| OtDsxF1 | 91  | QSKSPAPLHSGPDRTYECESPGSSSTPTTF   | PEVVRKAPMEPIRDNLGNNN                 | IGQKDLIQESLQLEKFRYSWEMMPLIYAIVK | TPDLEEAS                     | 180 |
| OtDsxF2 | 91  | QSKSPAPLHSGPDRTYECESPGSSSTPTTF   | PEVVRKAPMEPIRDNLGNNN                 | IGQKDLIQESLQLEKFRYSWEMMPLIYAIVK | TPDLEEAS                     | 180 |
| OtDsxF3 | 91  | QSKSPAPLHSGPDRTYECESPGSSSTPTTF   | PEVVRKAPMEPIRDNLGNNN                 | IGQKDLIQESLQLEKFRYSWEMMPLIYAIVK | TPDLEEAS                     | 180 |
| OtDsxF4 | 91  | QSKSPAPLHSGPDRTYECESPGSSSTPTTF   | PEVVRKAPMEPIRDNLGNNN                 | IGQKDLIQESLQLEKFRYSWEMMPLIYAIVK | TPDLEEAS                     | 180 |
| OtDsxF5 | 91  | QSKSPAPLHSGPDRTYECESPGSSSTPTTF   | PEVVRKAPMEPIRDNLGNNN                 | IGQKDLIQESLQLEKFRYSWEMMPLIYAIVK | TPDLEEAS                     | 180 |
| OtDsxM  | 91  | QSKSPAPLHSGPDRTYECESPGSSSTPTTF   | PEVVRKAPMEPIRDNLGNNN                 | IGQKDLIQESLQLEKFRYSWEMMPLIYAIVK | TPDLEEAS                     | 180 |
| OtDSXB  | 91  | QSKSPAPLHSGPDRTYECESPGSSSTPTTF   | PEVVRKAPMEPIRDNLGNN                  | -----                           | -----                        | 138 |
|         |     |                                  |                                      |                                 |                              |     |
| OtDsxF1 | 181 | KRIDEQORAVKEYSIINNLNMYDGGELRYP   | TRQYG                                | -----                           | -----                        | 215 |
| OtDsxF2 | 181 | KRIDEQORAVKEYSIINNLNMYDGGELRYP   | THKRAQERRSSGTFKPIGGVNPQVKNLHV        | K                               | -----                        | 241 |
| OtDsxF3 | 181 | KRIDEQORAVKEYSIINNLNMYDGGELRYP   | THKRAQERRSSGTFKPIGGVNLQKLD           | F                               | -----                        | 238 |
| OtDsxF4 | 181 | KRIDEQORAVKEYSTINNLNMYDGGELRYP   | THKRAQERRSSGTFKPIGGVNLQIFSV          | -----                           | -----                        | 237 |
| OtDsxF5 | 181 | KRIDEQORAVKEYSIINNLNMYDGGELRYP   | THKRAQERRSSGTFKPIGGVNLQRLMIQT        | WLY                             | -----                        | 242 |
| OtDsxM  | 181 | KRIDEQ                           | -----                                | -----                           | RDAEQLVDFFNKIKDRFHLSWKMISLIH | 214 |
| OtDSXB  | 138 | -----                            | -----                                | -----                           | -----                        | 138 |
|         |     |                                  |                                      |                                 |                              |     |
| OtDsxF1 | 215 | -----                            | -----                                | -----                           | -----                        | 215 |
| OtDsxF2 | 241 | -----                            | -----                                | -----                           | -----                        | 241 |
| OtDsxF3 | 238 | -----                            | -----                                | -----                           | -----                        | 238 |
| OtDsxF4 | 237 | -----                            | -----                                | -----                           | -----                        | 237 |
| OtDsxF5 | 242 | -----                            | -----                                | -----                           | -----                        | 242 |
| OtDsxM  | 215 | VILKNAKDDQEKAFRQIDEAFLEVOALAKYYP | TPVNLITDLWRWYSPTALYPAMYQLPNTLL       | GNIPPSPLHSPVPPRPSRA             | -----                        | 299 |
| OtDSXB  | 139 | -----                            | -----                                | -----                           | -----                        | 143 |
|         |     |                                  |                                      |                                 |                              |     |
| OtDsxF1 | 215 | -----                            | 215                                  | -----                           | -----                        | 215 |
| OtDsxF2 | 241 | -----                            | 241                                  | -----                           | -----                        | 241 |
| OtDsxF3 | 238 | -----                            | 238                                  | -----                           | -----                        | 238 |
| OtDsxF4 | 237 | -----                            | 237                                  | -----                           | -----                        | 237 |
| OtDsxF5 | 242 | -----                            | 242                                  | -----                           | -----                        | 242 |
| OtDsxM  | 299 | -----                            | 299                                  | -----                           | -----                        | 299 |
| OtDSXB  | 144 | NFFVKSFIYRCELIYFLKVHIKSKD        | 168                                  | -----                           | -----                        | 143 |

C

BmDsxF1 MVSMGSKRRVPDDCEERSEPGASS-SGVPRAPPNCARCRNHLKIELKGHKRYCKYQHCTCEKCRLTADRQRVMAKQTAIRRAQAQDEA  
 BmDsxF2 MVSMGSKRRVPDDCEERSEPGASS-SGVPRAPPNCARCRNHLKIELKGHKRYCKYQHCTCEKCRLTADRQRVMAKQTAIRRAQAQDEA  
 BmDsxM MVSMGSKRRVPDDCEERSEPGASS-SGVPRAPPNCARCRNHLKIELKGHKRYCKYQHCTCEKCRLTADRQRVMAKQTAIRRAQAQDEA  
 OtDsxF1 MSDQ-----QDYETKMDLNASSTSSSPRTPPNCARCRNHRVKVPLKGHKRYCKYRHCKCEKCRLTSERQRVMAMQTALRRAQAQDEA  
 OtDsxF2 MSDQ-----QDYETKMDLNASSTSSSPRTPPNCARCRNHRVKVPLKGHKRYCKYRHCKCEKCRLTSERQRVMAMQTALRRAQAQDEA  
 OtDsxF3 MSDQ-----QDYETKMDLNASSTSSSPRTPPNCARCRNHRVKVPLKGHKRYCKYRHCKCEKCRLTSERQRVMAMQTALRRAQAQDEA  
 OtDsxF4 MSDQ-----QDYETKMDLNASSTSSSPRTPPNCARCRNHRVKVPLKGHKRYCKYRHCKCEKCRLTSERQRVMAMQTALRRAQAQDEA  
 OtDsxF5 MSDQ-----QDYETKMDLNASSTSSSPRTPPNCARCRNHRVKVPLKGHKRYCKYRHCKCEKCRLTSERQRVMAMQTALRRAQAQDEA  
 OtDsxM MSDQ-----QDYETKMDLNASSTSSSPRTPPNCARCRNHRVKVPLKGHKRYCKYRHCKCEKCRLTSERQRVMAMQTALRRAQAQDEA

BmDsxF1 RARALELGIQPPGMELDRPVPPVVKAPRSPMIPPSAPRSLGSASCDSVPGSPGVSPYAPP-SVPPPTMPPLIPTPQPPVPSETLVENC  
 BmDsxF2 RARALELGIQPPGMELDRPVPPVVKAPRSPMIPPSAPRSLGSASCDSVPGSPGVSPYAPP-SVPPPTMPPLIPPPQPPVPSETLVENC  
 BmDsxM RARALELGIQPPGMELDRPVPPVVKAPRSPMIPPSAPRSLGSASCDSVPGSPGVSPYAPP-SVPPPTMPPLIPTPQPPVPSETLVENC  
 OtDsxF1 MLR-----QGVIPOKSKPAPLHSGPD--RTYECE----SPGSSSTPTFPVVRKAPMEPIRDNLGNNNIGOKDLIQES  
 OtDsxF2 MLR-----QGVIPOKSKPAPLHSGPD--RTYECE----SPGSSSTPTFPVVRKAPMEPIRDNLGNNNIGOKDLIQES  
 OtDsxF3 MLR-----QGVIPOKSKPAPLHSGPD--RTYECE----SPGSSSTPTFPVVRKAPMEPIRDNLGNNNIGOKDLIQES  
 OtDsxF4 MLR-----QGVIPOKSKPAPLHSGPD--RTYECE----SPGSSSTPTFPVVRKAPMEPIRDNLGNNNIGOKDLIQES  
 OtDsxF5 MLR-----QGVIPOKSKPAPLHSGPD--RTYECE----SPGSSSTPTFPVVRKAPMEPIRDNLGNNNIGOKDLIQES  
 OtDsxM MLR-----QGVIPOKSKPAPLHSGPD--RTYECE----SPGSSSTPTFPVVRKAPMEPIRDNLGNNNIGOKDLIQES

BmDsxF1 HRLLEKFRYSWEMMPLVLVIMNYARSDLEASRKIYEGKMIVDEYARKHNLNVFDGLELRNSTRQKMLEINNISGVLSSSMKLFCE----  
 BmDsxF2 HRLLEKFRYSWEMMPLVLVIMNYARSDLEASRKIYEGKMIVDEYARKHNLNVFDGLELRNSTRQYGL-----  
 BmDsxM HRLLEKFRYSWEMMPLVLVIMNYARSDLEASRKIYEG-----  
 OtDsxF1 LQLEKFRYSWEMMPLIYAIVK-DTPDLEEASKRIDEGQRAVKEYSIINNLMYDGGELRYPTRQYG-----  
 OtDsxF2 LQLEKFRYSWEMMPLIYAIVK-DTPDLEEASKRIDEGQRAVKEYSIINNLMYDGGELRYPTHKRAQERRSSGTFKPIGGVNPQVKRNL  
 OtDsxF3 LQLEKFRYSWEMMPLIYAIVK-DTPDLEEASKRIDEGQRAVKEYSIINNLMYDGGELRYPTHKRAQERRSSGTFKPIGGVNLQKLDF  
 OtDsxF4 LQLEKFRYSWEMMPLIYAIVK-DTPDLEEASKRIDEGQRAVKEYSTINNLMYDGGELRYPTHKRAQERRSSGTFKPIGGVNLQIFSV-  
 OtDsxF5 LQLEKFRYSWEMMPLIYAIVK-DTPDLEEASKRIDEGQRAVKEYSIINNLMYDGGELRYPTHKRAQERRSSGTFKPIGGVNLQRLMIQ  
 OtDsxM LQLEKFRYSWEMMPLIYAIVK-DTPDLEEASKRIDEG-----

BmDsxF1 -----  
 BmDsxF2 -----  
 BmDsxM -----  
 OtDsxF1 -----  
 OtDsxF2 HVK-----  
 OtDsxF3 -----  
 OtDsxF4 -----  
 OtDsxF5 TWLY-----  
 OtDsxM ----RDAEQLVDFFNKIKDRFHLNLSWKMISLIHVILKNAKDDQEKAFRQIDEAFLEVOALAKYYPTPVNLIITDLWRWYSPTALYPAMYYQL



D

OtDsxF1 MSDQQ-----DYETKMDLNASSTSSSPRTPP-NCARCRNHRVKVPLKGHKRYCKYRHCKCEK  
 OtDsxF2 MSDQQ-----DYETKMDLNASSTSSSPRTPP-NCARCRNHRVKVPLKGHKRYCKYRHCKCEK  
 OtDsxF3 MSDQQ-----DYETKMDLNASSTSSSPRTPP-NCARCRNHRVKVPLKGHKRYCKYRHCKCEK  
 OtDsxF4 MSDQQ-----DYETKMDLNASSTSSSPRTPP-NCARCRNHRVKVPLKGHKRYCKYRHCKCEK  
 OtDsxF5 MSDQQ-----DYETKMDLNASSTSSSPRTPP-NCARCRNHRVKVPLKGHKRYCKYRHCKCEK  
 OtDsxM MSDQQ-----DYETKMDLNASSTSSSPRTPP-NCARCRNHRVKVPLKGHKRYCKYRHCKCEK  
 OtDsxB MSDQQ-----DYETKMDLNASSTSSSPRTPP-NCARCRNHRVKVPLKGHKRYCKYRHCKCEK  
 AmDsxF1 MYREENEQNRAADLAPQQPSGANTFERLEHSQDSKNGDDGSKKVQTDASSSTNTPKPRARNCARCLNHRLEITLKSHKRYCKYRTCTCEK  
 AmDsxM MYREENEQNRAADLAPQQPSGANTFERLEHSQDSKNGDDGSKKVQTDASSSTNTPKPRARNCARCLNHRLEITLKSHKRYCKYRTCTCEK  
 AmDsxB MYREENEQNRAADLAPQQPSGANTFERLEHSQDSKNGDDGSKKVQTDASSSTNTPKPRARNCARCLNHRLEITLKSHKRYCKYRTCTCEK

OtDsxF1 CRLTSEQRVMAMQTALRRAQAQDEAMLR--QGV-----IPQ-----SKSPAPLHS--GPDRTYECESPGSS-----ST  
 OtDsxF2 CRLTSEQRVMAMQTALRRAQAQDEAMLR--QGV-----IPQ-----SKSPAPLHS--GPDRTYECESPGSS-----ST  
 OtDsxF3 CRLTSEQRVMAMQTALRRAQAQDEAMLR--QGV-----IPQ-----SKSPAPLHS--GPDRTYECESPGSS-----ST  
 OtDsxF4 CRLTSEQRVMAMQTALRRAQAQDEAMLR--QGV-----IPQ-----SKSPAPLHS--GPDRTYECESPGSS-----ST  
 OtDsxF5 CRLTSEQRVMAMQTALRRAQAQDEAMLR--QGV-----IPQ-----SKSPAPLHS--GPDRTYECESPGSS-----ST  
 OtDsxM CRLTSEQRVMAMQTALRRAQAQDEAMLR--QGV-----IPQ-----SKSPAPLHS--GPDRTYECESPGSS-----ST  
 OtDsxB CRLTSEQRVMAMQTALRRAQAQDEAMLR--QGV-----IPQ-----SKSPAPLHS--GPDRTYECESPGSS-----ST  
 AmDsxF1 CKITANRQVMRQNMKLRHLA QDKVKVRVAEEV-----DLPFGVENTISSVPQPPRSLEGSYDSSSGDSPVSSHSSNGIHTGFGGSI  
 AmDsxM CKITANRQVMRQNMKLRHLA QDKVKVRVAEEV-----DLPFGVENTISSVPQPPRSLEGSYDSSSGDSPVSSHSSNGIHTGFGGSI  
 AmDsxB CKITANRQVMRQNMKLRHLA QDKVKVRVAEEVSLFLVS-----

OtDsxF1 PTFPEVVRKAPMEP-----IRDNLGNN-----NIGQKDLIQESLQLEKFRYSWEMMPLIYAI  
 OtDsxF2 PTFPEVVRKAPMEP-----IRDNLGNN-----NIGQKDLIQESLQLEKFRYSWEMMPLIYAI  
 OtDsxF3 PTFPEVVRKAPMEP-----IRDNLGNN-----NIGQKDLIQESLQLEKFRYSWEMMPLIYAI  
 OtDsxF4 PTFPEVVRKAPMEP-----IRDNLGNN-----NIGQKDLIQESLQLEKFRYSWEMMPLIYAI  
 OtDsxF5 PTFPEVVRKAPMEP-----IRDNLGNN-----NIGQKDLIQESLQLEKFRYSWEMMPLIYAI  
 OtDsxM PTFPEVVRKAPMEP-----IRDNLGNN-----NIGQKDLIQESLQLEKFRYSWEMMPLIYAI  
 OtDsxB PTFPEVVRKAPMEP-----IRDNLGNNSKYFYNFVKSFIYRCELIYFLKVHIKSKD-----  
 AmDsxF1 ITIPPTRKLPPLHPHTAMVTHLPQTLTSE-----NV--EILLEHSSKLVELFOYPWEALLMYIN  
 AmDsxM ITIPPTRKLPPLHPHTAMVTHLPQTLTSE-----NV--EILLEHSSKLVELFOYPWEALLMYIN  
 AmDsxB -----



|         |                                                                                                                                                            |
|---------|------------------------------------------------------------------------------------------------------------------------------------------------------------|
| OtDsxF1 | VKDT-PDLEEASKRIDEGQRAVKEYSI INN--LNMYDGGELRYPTRQYG-----                                                                                                    |
| OtDsxF2 | VKDT-PDLEEASKRIDEGQRAVKEYSI INN--LNMYDGGELRYPTHKRAQERRSSGTFKPIGGVNPQVQRNLHVK-----                                                                          |
| OtDsxF3 | VKDT-PDLEEASKRIDEGQRAVKEYSI INN--LNMYDGGELRYPTHKRAQERRSSGTFKPIGGVNLQLKLD-----                                                                              |
| OtDsxF4 | VKDT-PDLEEASKRIDEGQRAVKEYST INN--LNMYDGGELRYPTHKRAQERRSSGTFKPIGGVNLQIFSV-----                                                                              |
| OtDsxF5 | VKDT-PDLEEASKRIDEGQRAVKEYSI INN--LNMYDGGELRYPTHKRAQERRSSGTFKPIGGVNLQRLMIQTWLY-----                                                                         |
| OtDsxM  | VKDT-PDLEEASKRIDEG-----RDAEOLVDFFNKIK                                                                                                                      |
| OtDsxB  | -----                                                                                                                                                      |
| AmDsxF1 | LKYAGANPEEVVRRMVDALIFCSKNFIWNSILNKIVSFINLLPT-----                                                                                                          |
| AmDsxM  | LKYAGANPEEVVRRMVD-----                                                                                                                                     |
| AmDsxB  | -----                                                                                                                                                      |
| OtDsxF1 | -----                                                                                                                                                      |
| OtDsxF2 | -----                                                                                                                                                      |
| OtDsxF3 | -----                                                                                                                                                      |
| OtDsxF4 | -----                                                                                                                                                      |
| OtDsxF5 | -----                                                                                                                                                      |
| OtDsxM  | DRFHLSWKMISLIHVILKNKAKDDQEKAFRQIDEAFLEVQALAKYYPTPVNLIITDLWRWYSPTALYPAMYQLPNTLLGNI PPSPLHSPV                                                                |
| OtDsxB  | -----                                                                                                                                                      |
| AmDsxF1 | -----                                                                                                                                                      |
| AmDsxM  | -----                                                                                                                                                      |
| AmDsxB  | -----                                                                                                                                                      |
| OtDsxF1 | -----                                                                                                                                                      |
| OtDsxF2 | -----                                                                                                                                                      |
| OtDsxF3 | -----                                                                                                                                                      |
| OtDsxF4 | -----                                                                                                                                                      |
| OtDsxF5 | -----                                                                                                                                                      |
| OtDsxM  | PPPRPRSRA-----                                                                                                                                             |
| OtDsxB  | -----                                                                                                                                                      |
| AmDsxF1 | -----                                                                                                                                                      |
| AmDsxM  | -----SNEIRNMHFLKAI R M S Q P S R A F R C T A A C A A P T G P P T G P P T Y E G D V P F I G V G P P P N P I H F R P F L H P E N A H I P A T R L P S S P D G |
| AmDsxB  | -----                                                                                                                                                      |
| OtDsxF1 | -----                                                                                                                                                      |
| OtDsxF2 | -----                                                                                                                                                      |
| OtDsxF3 | -----                                                                                                                                                      |
| OtDsxF4 | -----                                                                                                                                                      |
| OtDsxF5 | -----                                                                                                                                                      |
| OtDsxM  | -----                                                                                                                                                      |
| OtDsxB  | -----                                                                                                                                                      |
| AmDsxF1 | -----                                                                                                                                                      |
| AmDsxM  | PPKHT                                                                                                                                                      |
| AmDsxB  | -----                                                                                                                                                      |



Odsdxxm CAATCGAAAAGCCCCGTGCCACTTTATAACGGCCCCGGATCGAACGTACGAATGTGAATCACC CGGTTCTTCGTCAACACCAACTTTTCCG  
Odsdxf1 CAATCGAAAAGCCCCGTGCCACTTTATAACGGCCCCGGATCGAACGTACGAATGTGAATCACC CGGTTCTTCGTCAACACCAACTTTTCCG  
Odsdxf2 CAATCGAAAAGCCCCGTGCCACTTTATAACGGCCCCGGATCGAACGTACGAATGTGAATCACC CGGTTCTTCGTCAACACCAACTTTTCCG  
Odsdxf3 CAATCGAAAAGCCCCGTGCCACTTTATAACGGCCCCGGACCGAACGTACGAATGTGAATCACC CGGTTCTTCGTCAACACCAACTTTTCCG  
Odsdxf4 CAATCGAAAAGCCCCGTGCCACTTTATAACGGCCCCGGATCGAACGTACGAATGTGAATCACC CGGTTCTTCGTCAACACCAACTTTTCCG  
Odsdxf5 CAATCGAAAAGCCCCGTGCCACTTTATAACGGCCCCGGACCGAACGTACGAATGTGAATCACC CGGTTCTTCGTCAACACCAACTTTTCCG  
Otdsxf1 CAATCGAAAAGCCCTGCACCCTTCATAGTGGCCCCGACC GAACATACGAATGTGAATCACCAGGATCTTCATCAACACCAACTTTTCCG  
Otdsxf2 CAATCGAAAAGCCCTGCACCCTTCATAGTGGCCCCGACC GAACATACGAATGTGAATCACCAGGATCTTCATCAACACCAACTTTTCCG  
Otdsxf3 CAATCGAAAAGCCCTGCACCCTTCATAGTGGCCCCGACC GAACATACGAATGTGAATCACCAGGATCTTCATCAACACCAACTTTTCCG  
Otdsxf4 CAATCGAAAAGCCCTGCACCCTTCATAGTGGCCCCGACC GAACATACGAATGTGAATCACCAGGATCTTCATCAACACCAACTTTTCCG  
Otdsxf5 CAATCGAAAAGCCCTGCACCCTTCATAGTGGCCCCGACC GAACATACGAATGTGAATCACCAGGATCTTCATCAACACCAACTTTTCCG  
Otdsxxm CAATCGAAAAGCCCTGCACCCTTCATTAGTGGCCCCGACC GAACATACGAATGTGAATCACCAGGATCTTCATCAACACCAACTTTTCCG

Odsdxxm GATGTTGTGAGGAAAAGCGCCGATGGAACCGATCAGAGATAATTTGGGAAAATAATAATATTGGCCAAAAAGATTTAATTCAAGAAAAGTTTA  
Odsdxf1 GATGTTGTGAGGAAAAGCGCCGATGGAACCGATCAGAGATAATTTGGGAAAATAATAATATTGGCCAAAAAGATTTAATTCAAGAAAAGTTTA  
Odsdxf2 GATGTTGTGAGGAAAAGCGCCGATGGAACCGATCAGAGATAATTTGGGAAAATAATAATATTGGCCAAAAAGATTTAATTCAAGAAAAGTTTA  
Odsdxf3 GATGTTGTGAGGAAAAGCGCCGATGGAACCGATCAGAGATAATTTGGGAAAATAATAATATTGGCCAAAAAGATTTAATTCAAGAAAAGTTTA  
Odsdxf4 GATGTTGTGAGGAAAAGCGCCGATGGAACCGATCAGAGATAATTTGGGAAAATAATAATATTGGCCAAAAAGATTTAATTCAAGAAAAGTTTA  
Otdsxf1 GAAGTTGTCAGGAAAAGCGCCGATGGAACCAATCAGAGATAATTTGGGGAATAACAATATTGGCCAAAAAGATTTAATTCAAGAAAAGCTTA  
Otdsxf2 GAAGTTGTCAGGAAAAGCGCCGATGGAACCAATCAGAGATAATTTGGGGAATAACAATATTGGCCAAAAAGATTTAATTCAAGAAAAGCTTA  
Otdsxf3 GAAGTTGTCAGGAAAAGCGCCGATGGAACCAATCAGAGATAATTTGGGGAATAACAATATTGGCCAAAAAGATTTAATTCAAGAAAAGCTTA  
Otdsxf4 GAAGTTGTCAGGAAAAGCGCCGATGGAACCAATCAGAGATAATTTGGGGAATAACAATATTGGCCAAAAAGATTTAATTCAAGAAAAGCTTA  
Otdsxf5 GAAGTTGTCAGGAAAAGCGCCGATGGAACCAATCAGAGATAATTTGGGGAATAACAATATTGGCCAAAAAGATTTAATTCAAGAAAAGCTTA  
Otdsxxm GAAGTTGTCAGGAAAAGCGCCGATGGAACCAATCAGAGATAATTTGGGGAATAACAATATTGGCCAAAAAGATTTAATTCAAGAAAAGCTTA

Odsdxxm CAACTACTAGAAAAATTTTCGATATTCGTGGGAAATGATGCCATTGATTTATGCGATAGTCAAAGACACTCCAGATCTCGAGGAAGCATCA  
Odsdxf1 CAACTACTAGAAAAATTTTCGATATTCGTGGGAAATGATGCCATTGATTTATGCGATAGTCAAAGACACTCCAGATCTCGAGGAAGCATCA  
Odsdxf2 CAACTACTAGAAAAATTTTCGATATTCGTGGGAAATGATGCCATTGATTTATGCGATAGTCAAAGACACTCCAGATCTCGAGGAAGCATCA  
Odsdxf3 CAACTACTAGAAAAATTTTCGATATTCGTGGGAAATGATGCCATTGATTTATGCGATAGTCAAAGACACTCCAGATCTCGAGGAAGCATCA  
Odsdxf4 CAACTACTAGAAAAATTTTCGATATTCGTGGGAAATGATGCCATTGATTTATGCGATAGTCAAAGACACTCCAGATCTCGAGGAAGCATCA  
Odsdxf5 CAACTACTAGAAAAATTTTCGATATTCGTGGGAAATGATGCCATTGATTTATGCGATAGTCAAAGACACTCCAGATCTCGAGGAAGCATCA  
Otdsxf1 CAACTATTAGAAAAGTTCGGATATTCGTGGGAAATGATGCCATTGATTTATGCGATAGTCAAAGACACTCCAGATCTCGAAGAAGCGTCA  
Otdsxf2 CAACTATTAGAAAAGTTCGGATATTCGTGGGAAATGATGCCATTGATTTATGCGATAGTCAAAGACACTCCAGATCTCGAAGAAGCGTCA  
Otdsxf3 CAACTATTAGAAAAGTTCGGATATTCGTGGGAAATGATGCCATTGATTTATGCGATAGTCAAAGACACTCCAGATCTCGAAGAAGCGTCA  
Otdsxf4 CAACTATTAGAAAAGTTCGGATATTCGTGGGAAATGATGCCATTGATTTATGCGATAGTCAAAGACACTCCAGATCTCGAAGAAGCGTCA  
Otdsxf5 CAACTATTAGAAAAGTTCGGATATTCGTGGGAAATGATGCCATTGATTTATGCGATAGTCAAAGACACTCCAGATCTCGAAGAAGCGTCA  
Otdsxxm CAACTATTAGAAAAGTTCGGATATTCGTGGGAAATGATGCCATTGATTTATGCGATAGTCAAAGACACTCCAGATCTCGAAGAAGCGTCA

Osdsxm AAACGTATTGATGAAGG-----  
Osdsxf1 AAACGTATTGATGAAGGGCAAAGAGCAGTGAAGGAATACTCAATAATCAACAACCTCAACATGTATGACGGTGGAGAGCTACGTTATCCT  
Osdsxf2 AAACGTATTGATGAAGGGCAAAGAGCAGTGAAGGAATACTCAATAATCAACAACCTCAACATGTATGACGGTGGAGAGCTACGTTATCCT  
Osdsxf3 AAACGTATTGATGAAGGGCAAAGAGCAGTGAAGGAATACTCAATAATCAACAACCTCAACATGTATGACGGTGGAGAGCTACGTTATCCT  
Osdsxf4 AAACGTATTGATGAAGGGCAAAGAGCAGTGAAGGAATACTCAATAATCAACAACCTCAACATGTACGACGGTGGAGAGCTACGTTATCCT  
Osdsxf5 AAACGTATTGATGAAGGGCAAAGAGCAGTGAAGGAATACTCAATAATCAACAACCTCAACATGTACGACGGTGGAGAGCTACGTTATCCT  
Otdsxf1 AAACGTATAGATGAAGGGCAAAGGGCAGTGAAGGAATACTCAATAATCAACAACCTCAACATGTACGACGGTGGAGAGCTACGTTATCCT  
Otdsxf2 AAACGTATAGATGAAGGGCAAAGGGCAGTGAAGGAATACTCAATAATCAACAACCTCAACATGTACGACGGTGGAGAGCTACGTTATCCT  
Otdsxf3 AAACGTATAGATGAAGGGCAAAGGGCAGTGAAGGAATACTCAATAATCAACAACCTCAACATGTACGACGGTGGAGAGCTACGTTATCCT  
Otdsxf4 AAACGTATAGATGAAGGGCAAAGGGCAGTGAAGGAATACTCAATAATCAACAACCTCAACATGTACGACGGTGGAGAGCTACGTTATCCT  
Otdsxf5 AAACGTATAGATGAAGGGCAAAGGGCAGTGAAGGAATACTCAATAATCAACAACCTCAACATGTACGACGGTGGAGAGCTACGTTATCCT  
Otdsxm AAACGTATAGATGAAGG-----

Osdsxm -----  
Osdsxf1 ACTC-----  
Osdsxf2 ACTC-----  
Osdsxf3 ACTC-----  
Osdsxf4 ACTC-----  
Osdsxf5 ACTCGTCAGTATGGATGATTAAAAATTTAAAAATTATTTCAATACAATAAAAAAGTATCCATAAGAATCAACTTTAAATATTTTTTAATA  
Otdsxf1 ACTCGTCAGTATGGATGATTAAAGATTTAAAAAT-ATTTCAATACAATAAAAAAGTATCCATAAGAGTCAACTTTAAATATTTTTTAATA  
Otdsxf2 ACTC-----  
Otdsxf3 ACTC-----  
Otdsxf4 ACTC-----  
Otdsxf5 ACTC-----  
Otdsxm -----

Osdsxm -----  
Osdsxf1 -----  
Osdsxf2 -----  
Osdsxf3 -----  
Osdsxf4 -----  
Osdsxf5 ACTTTTAACTAAAAATAATAATTTTTTCATCTATCTCTTTATTTCTTCGATAAAACAATCATTTTTTTAGTAGTAATGCATGTTTTTTTC  
Otdsxf1 ACTTTTAACTAAAAATAACAATTTTTT-CATCTTTCTCTTTATTTCTTCGATAAAATAATAATTTTTTTAGTAGTAATGCATGTTTTTTTC  
Otdsxf2 -----  
Otdsxf3 -----  
Otdsxf4 -----  
Otdsxf5 -----  
Otdsxm -----

Odsdxml  
-----ATAAGAGGGCGCAAGAACGACGATCTTCCGGGAACCTCAAACCAATCGGCGGCGTAAATCTTCAG--  
Odsdxf1  
-----ATAAGAGGGCGCAAGAACGACGATCTTCCGGGAACCTCAAACCAATCGGCGGCGTAAATCTTCAGG  
Odsdxf2  
-----ATAAGAGGGCGCAAGAACGACGATCTTCCGGGAACCTCAAACCAATCGGCGGCGTAAATCTTCAGG  
Odsdxf3  
-----ATAAGAGGGCGCAAGAACGACGATCTTCCGGGAACCTCAAACCAATCGGCGGCGTAAATCTTCAGG  
Odsdxf4  
-----ATAAGAGGGCGCAAGAACGACGATCTTCCGGGAACCTCAAACCAATCGGCGGCGTAAATCTTCAGG  
Odsdxf5  
TGCATTTTATTTCCACAACATAGATAAGAGGGCGCAAGAACGACGATCTTCCGGGAACCTCAAACCAATCGGCGGCGTAAATCTTCAGG  
Otdsxf1  
TGCATTTTGTTCACAACATAGATAAGAGGGCGCAAGAACGACGATCTTCCGGGACCTCAAACCAATCGGCGGCGTAAATCTTCAGG  
Otdsxf2  
-----ATAAGAGGGCGCAAGAACGACGATCTTCCGGGACCTCAAACCAATCGGCGGCGTAAATCTTCAGG  
Otdsxf3  
-----ATAAGAGGGCGCAAGAACGACGATCTTCCGGGACCTCAAACCAATCGGCGGCGTAAATCTTCAG--  
Otdsxf4  
-----ATAAGAGGGCGCAAGAACGACGATCTTCCGGGACCTCAAACCAATCGGCGGCGTAAATCTTCAG--  
Otdsxf5  
-----ATAAGAGGGCGCAAGAACGACGATCTTCCGGGACCTCAAACCAATCGGCGGCGTAAATCTTCAG--  
Otdsxml  
-----

Odsdxml  
-----CGTTTAAACGATTCAAACCTGGCT  
Odsdxf1  
TGAAAG-----ATTTT**TAG**CGTTTAAACGATTCAAACCTGGCC  
Odsdxf2  
TGAAAGGCAACTTACAC-----CGTTTAAACGATTCAAACCTGGCT  
Odsdxf3  
TGAAAGGCAACTTACACGTTAAA**T**AGGATATCATCATTTACCGTATAGTTAAAATTAGATTTTTAGCGTTTAAACGGTTCAAACCTGGCT  
Odsdxf4  
TGAAAGGCAACTTACACGTTAAAATAAGGATATCATCATTTACCGTATAGTTAAAATTAGATTTTTAGCGTTTAAACGATTCAAACCTGGCT  
Otdsxf1  
TGAAACGCAACTTACACGTTAAAATAAGGATATCATCATTTACCGTATAGTTAAAATTAGATTTTTAGCGTTTAAATGATTCAAACCTGGCT  
Otdsxf2  
TGAAACGCAACTTACACGTTAAA**T**AGGATATCATCATTTACCGTATAGTTAAAATTAGATTTTTAGCGTTTAAATGATTCAAACCTGGCT  
Otdsxf3  
-----TTAAAATTAGATTTTT**TAG**CGTTTAAATGATTCAAACCTGGCT  
Otdsxf4  
-----ATTTTTAGCGTT**T**AATGATTCAAACCTGGCT  
Otdsxf5  
-----CGTTTAAATGATTCAAACCTGGCT  
Otdsxml  
-----

Odsdxml  
-----GTGTAATAATAT  
Odsdxf1  
TTATTAACACAAAAAGAATGATCCGGCCTTAACGAAGAGTATTATTACAATAAAATTTAAAG**TAG**AAA-----GTGTAATAATAT  
Odsdxf2  
TTATTAACACAAAAAGAATGATCCGGCCTTAACGAAGAGTATTATTACAATAAAATTTAAAGTAGAAA-----GTGTAATAATAT  
Odsdxf3  
TTAT**T**AACACAAAAAGAATGATCCGGCCTTAACGAAGAGTATTATTACAATAAAATTTAAAGTAGAAA-----GTGTAATAATAT  
Odsdxf4  
TTATTAACACAAAAAGAATGATCCGGCCTTAACGAAGAGTATTATTACAATAAAATTTAAAGTAGAAA-----GTGTAATAATAT  
Odsdxf5  
TTATTAACACAAAAAGAATGATCCGGCCTTAACGAAGAGTATTATTACAATAAAATTTAAAGTAGAAA-----GTGTAATAATAT  
Otdsxf1  
TTATTAATACAAAAAGAATGATCCGGCCTTAACGAAGAGTATTATTACAATAAAATTTAATGTAGAAAACTAACGTTCAAGTGTAATAATAT  
Otdsxf2  
TTATTAATACAAAAAGAATGATCCGGCCTTAACGAAGAGTATTATTACAATAAAATTTAATGTAGAAAACTAACGTTCAAGTGTAATAATAT  
Otdsxf3  
TTATTAATACAAAAAGAATGATCCGGCCTTAACGAAGAGTATTATTACAATAAAATTTAATGTAGAAAACTAACGTTCAAGTGTAATAATAT  
Otdsxf4  
TTATTAATACAAAAAGAATGATCCGGCCTTAACGAAGAGTATTATTACAATAAAATTTAATGTAGAAAACTAACGTTCAAGTGTAATAATAT  
Otdsxf5  
TTAT**T**AATACAAAAAGAATGATCCGGCCTTAACGAAGAGTATTATTACAATAAAATTTAATGTAGAAAACTAACGTTCAAGTGTAATAATAT  
Otdsxml  
-----

Osdsxm -----  
Osdsxf1 AATTATTAAGAGTATACATTAAGCCAATTTTTTTATAAACAGTATTTTTTTAATGAAGAAGCCTCAATTATTTTCTTTATAAGCATTAC  
Osdsxf2 AATTATTAAGAGTATACATTAAGCCAATTTTTTTATAAACAGTATTTTTTTAATGAAGAAGCCTCAATTATTTTCTTTATAAGCATTAC  
Osdsxf3 AATTATTAAGAGTATACATTAAGCCAATTTTTTTATAAACAGTATTTTTTTAATGAAGAAGCCTCAATTATTTTCTTTATAAGCATTAC  
Osdsxf4 AATTATTAAGAGTATACATTAAGCCAATTTTTTTATAAACAGTATTTTTTTAATGAAGAAGCCTCAATTATTTTCTTTATAAGCATTAC  
Osdsxf5 AATTATTAAGAGTATACATTAAGCCAATTTTTTTATAAACAGTATTTTTTTAATGAAGAAGCCTCAATTATTTTCTTTATAAGCATTAC  
Otdsxf1 AATTATTAAGACTACATATTAAGCCAATTTTTT-ATGAATCAGTATTTTTT-AACGAAGAAGCCTCAATTATTTTGCTTATAAGTATTAC  
Otdsxf2 AATTATTAAGACTACATATTAAGCCAATTTTTT-ATGAATCAGTATTTTTT-AACGAAGAAGCCTCAATTATTTTGCTTATAAGTATTAC  
Otdsxf3 AATTATTAAGACTACATATTAAGCCAATTTTTT-ATGAATCAGTATTTTTT-AACGAAGAAGCCTCAATTATTTTGCTTATAAGTATTAC  
Otdsxf4 AATTATTAAGACTACATATTAAGCCAATTTTTT-ATGAATCAGTATTTTTT-AACGAAGAAGCCTCAATTATTTTGCTTATAAGTATTAC  
Otdsxf5 AATTATTAAGACTACATATTAAGCCAATTTTTT-ATGAATCAGTATTTTTT-AACGAAGAAGCCTCAATTATTTTGCTTATAAGTATTAC  
Otdsxm -----

Osdsxm -----TAGAGATGCTGAACAATTGG  
Osdsxf1 GTATATTTTTGCGGCATTAGTACTTTAATTTATCGGCGCACCTATTATCAACAAAAATGTATAATAAAGGTAGAGATGCTGAACAATTGG  
Osdsxf2 GTATATTTTTGCGGCATTAGTACTTTAATTTATCGGCGCACCTATTATCAACAAAAATGTATAATAAAGGTAGAGATGCTGAACAATTGG  
Osdsxf3 GTATATTTTTGCGGCATTAGTACTTTAATTTATCGGCGCACCTATTATCAACAAAAATGTATAATAAAGGTAGAGATGCTGAACAATTGG  
Osdsxf4 GTATATTTTTGCGGCATTAGTACTTTAATTTATCGGCGCACCTATTATCAACAAAAATGTATAATAAAGGTAGAGATGCTGAACAATTGG  
Otdsxf1 ATAT-TCTTTGCGGCATTATTACATTAATTTATCTGCGCACCTATTATCAACAAAAACGTATAATAAAGGTAGAGATGCTGAACAATTGG  
Otdsxf2 ATAT-TCTTTGCGGCATTATTACATTAATTTATCTGCGCACCTATTATCAACAAAAACGTATAATAAAGGTAGAGATGCTGAACAATTGG  
Otdsxf3 ATAT-TCTTTGCGGCATTATTACATTAATTTATCTGCGCACCTATTATCAACAAAAACGTATAATAAAGGTAGAGATGCTGAACAATTGG  
Otdsxf4 ATAT-TCTTTGCGGCATTATTACATTAATTTATCTGCGCACCTATTATCAACAAAAACGTATAATAAAGGTAGAGATGCTGAACAATTGG  
Otdsxf5 ATAT-TCTTTGCGGCATTATTACATTAATTTATCTGCGCACCTATTATCAACAAAAACGTATAATAAAGGTAGAGATGCTGAACAATTGG  
Otdsxm -----TAGAGATGCTGAACAATTGG

Osdsxm TGGATTTTTTTAACAAAATAAAGGATAGGTTTCACTTATCCTGGAAAATGATCTCACTTATCCACGTCATCCTAAAGAACTCTAAGGACG  
Osdsxf1 TGGATTTTTTTAACAAAATAAAGGATAGGTTTCACTTATCCTGGAAAATGATCTCACTTATCCACGTCATCCTAAAGAACTCTAAGGACG  
Osdsxf2 TGGATTTTTTTAACAAAATAAAGGATAGGTTTCACTTATCCTGGAAAATGATCTCACTTATCCACGTCATCCTAAAGAACTCTAAGGACG  
Osdsxf3 TGGATTTTTTTAACAAAATAAAGGATAGGTTTCACTTATCCTGGAAAATGATCTCACTTATCCACGTCATCCTAAAGAACTCTAAGGACG  
Osdsxf4 TGGATTTTTTTAACAAAATAAAGGATAGGTTTCACTTATCCTGGAAAATGATCTCACTTATCCACGTCATCCTAAAGAACTCTAAGGACG  
Osdsxf5 TGGATTTTTTTAACAAAATAAAGGATAGGTTTCACTTATCCTGGAAAATGATCTCACTTATCCACGTCATCCTAAAGAACTCTAAGGACG  
Otdsxf1 TGGATTTTTTTAATAAAAATAAAGGATAGGTTTCACTTATCCTGGAAAATGATCTCACTTATCCACGTCATCCTAAAGAACGCTAAGGACG  
Otdsxf2 TGGATTTTTTTAATAAAAATAAAGGATAGGTTTCACTTATCCTGGAAAATGATCTCACTTATCCACGTCATCCTAAAGAACGCTAAGGACG  
Otdsxf3 TGGATTTTTTTAATAAAAATAAAGGATAGGTTTCACTTATCCTGGAAAATGATCTCACTTATCCACGTCATCCTAAAGAACGCTAAGGACG  
Otdsxf4 TGGATTTTTTTAATAAAAATAAAGGATAGGTTTCACTTATCCTGGAAAATGATCTCACTTATCCACGTCATCCTAAAGAACGCTAAGGACG  
Otdsxf5 TGGATTTTTTTAATAAAAATAAAGGATAGGTTTCACTTATCCTGGAAAATGATCTCACTTATCCACGTCATCCTAAAGAACGCTAAGGACG  
Otdsxm TGGATTTTTTTAATAAAAATAAAGGATAGGTTTCACTTATCCTGGAAAATGATCTCACTTATCCACGTCATCCTAAAGAACGCTAAGGACG

Osdsm ACCAGGAGAAAGCTTTCCGACAAATCGATGAAGCATACTGGAGGTACAGGCTTTAGCAAAATACTATCCGACACCGGTTAACCTCATCA  
Osdxf1 ACCAGGAGAAAGCTTTCCGACAAATCGATGAAGCATACTGGAGGTACAGGCTTTAGCAAAATACTATCCGACACCGGTTAACCTCATCA  
Osdxf2 ACCAGGAGAAAGCTTTCCGACAAATCGATGAAGCATACTGGAGGTACAGGCTTTAGCAAAATACTATCCGACACCGGTTAACCTCATCA  
Osdxf3 ACCAGGAGAAAGCTTTCCGACAAATCGATGAAGCATACTGGAGGTACAGGCTTTAGCAAAATACTATCCGACACCGGTTAACCTCATCA  
Osdxf4 ACCAGGAGAAAGCTTTCCGACAAATCGATGAAGCATACTGGAGGTACAGGCTTTAGCAAGATACTATCCGACACCGGTTAACCTCATCA  
Osdxf5 ACCAGGAGAAAGCTTTCCGACAAATCGATGAAGCATACTGGAGGTACAGGCTTTAGCAAAATACTATCCGACACCGGTTAACCTCATCA  
Otdxf1 ATCAGGAGAAAGCTTTTAGACAAATCGATGAAGCATTCTGGAGGTACAGGCTTTAGCAAAATACTATCCAACACCGGTTAACCTCATCA  
Otdxf2 ATCAGGAGAAAGCTTTTAGACAAATCGATGAAGCATTCTGGAGGTACAGGCTTTAGCAAAATACTATCCAACACCGGTTAACCTCATCA  
Otdxf3 ATCAGGAGAAAGCTTTTAGACAAATCGATGAAGCATTCTGGAGGTACAGGCTTTAGCAAAATACTATCCAACACCGGTTAACCTCATCA  
Otdxf4 ATCAGGAGAAAGCTTTTAGACAAATCGATGAAGCATTCTGGAGGTACAGGCTTTAGCAAAATACTATCCAACACCGGTTAACCTCATCA  
Otdxf5 ATCAGGAGAAAGCTTTTAGACAAATCGATGAAGCATTCTGGAGGTACAGGCTTTAGCAAAATACTATCCAACACCGGTTAACCTCATCA  
Otdsm ATCAGGAGAAAGCTTTTAGACAAATCGATGAAGCATTCTGGAGGTACAGGCTTTAGCAAAATACTATCCAACACCGGTTAACCTCATCA

Osdsm CCGACCCATGGCGATGGTATTCACCTACAGCACTTTACCCGGCGATGTACTATCAACTACCTAATACCCCTTCTTGAAATATTCCACCGA  
Osdxf1 CCGACCCATGGCGATGGTATTCACCTACAGCACTTTACCCGGCGATGTACTATCAACTACCTAATACCCCTTCTTGAAATATTCCACCGA  
Osdxf2 CCGACCCATGGCGATGGTATTCACCTACAGCACTTTACCCGGCGATGTACTATCAACTACCTAATACCCCTTCTTGAAATATTCCACCGA  
Osdxf3 CCGACCCATGGCGATGGTATTCACCTACAGCACTTTACCCGGCGATGTACTATCAACTACCTAATACCCCTTCTTGAAATATTCCACCGA  
Osdxf4 CCGACCCATGGCGATGGTATTCACCTACAGCACTTTACCCGGCGATGTACTATCAACTACCTAATACCCCTTCTTGAAATATTCCACCGA  
Osdxf5 CCGACCCATGGCGATGGTATTCACCTACAGCACTTTACCCGGCGATGTACTATCAACTACCTAATACCCCTTCTTGAAATATTCCACCGA  
Otdxf1 CTGACCCATGGAGATGGTATTCACCTACAGCACTTTACCCGGCGATGTACTATCAACTACCTAATACCCCTTCTTGAAATATTCCACCGA  
Otdxf2 CTGACCCATGGAGATGGTATTCACCTACAGCACTTTACCCGGCGATGTACTATCAACTACCTAATACCCCTTCTTGAAATATTCCACCGA  
Otdxf3 CTGACCCATGGAGATGGTATTCACCTACAGCACTTTACCCGGCGATGTACTATCAACTACCTAATACCCCTTCTTGAAATATTCCACCGA  
Otdxf4 CTGACCCATGGAGATGGTATTCACCTACAGCACTTTACCCGGCGATGTACTATCAACTACCTAATACCCCTTCTTGAAATATTCCACCGA  
Otdxf5 CTGACCCATGGAGATGGTATTCACCTACAGCACTTTACCCGGCGATGTACTATCAACTACCTAATACCCCTTCTTGAAATATTCCACCGA  
Otdsm CTGACCCATGGAGATGGTATTCACCTACAGCACTTTACCCGGCGATGTACTATCAACTACCTAATACCCCTTCTTGAAATATTCCACCGA

Osdsm GTCCACCTTTACATTACCGGTACCACCCCAAGACCTAGAAGTAGAGCGTGA  
Osdxf1 GTCCACCTTTACATTACCGGTACCACCCCAAGACCTAGAAGTAGAGCGTGA  
Osdxf2 GTCCACCTTTACATTACCGGTACCACCCCAAGACCTAGAAGTAGAGCGTGA  
Osdxf3 GTCCACCTTTACATTACCGGTACCACCCCAAGACCTAGAAGTAGAGCGTGA  
Osdxf4 GTCCACCTTTACATTACCGGTACCACCCCAAGACCTAGAAGTAGAGCGTGA  
Osdxf5 GTCCACCTTTACATTACCGGTACCACCCCAAGACCTAGAAGTAGAGCGTGA  
Otdxf1 GTCCACCTTTACATTACCGGTACCACCCCAAGACCTAGAAGTAGAGCGTGA  
Otdxf2 GTCCACCTTTACATTACCGGTACCACCCCAAGACCTAGAAGTAGAGCGTGA  
Otdxf3 GTCCACCTTTACATTACCGGTACCACCCCAAGACCTAGAAGTAGAGCGTGA  
Otdxf4 GTCCACCTTTACATTACCGGTACCACCCCAAGACCTAGAAGTAGAGCGTGA  
Otdxf5 GTCCACCTTTACATTACCGGTACCACCCCAAGACCTAGAAGTAGAGCGTGA  
Otdsm GTCCACCTTTACATTACCGGTACCACCCCAAGACCTAGAAGTAGAGCGTGA

F

OsDsxF1 MSDQQDYETKMDLNASSTSSSPRTFPNCARCRNHRVKVPLKGHKRYCKYRHCKCEKCRLTSEQRVMAKQTALRRAQAQDEAMLRQGVIP  
 OsDsxF2 MSDQQDYETKMDLNASSTSSSPRTFPNCARCRNHRVKVPLKGHKRYCKYRHCKCEKCRLTSEQRVMAKQTALRRAQAQDEAMLRQGVIP  
 OsDsxF3 MSDQQDYETKMDLNASSTSSSPRTFPNCARCRNHRVKVPLKGHKRYCKYRHCKCEKCRLTSEQRVMAKQTALRRAQAQDEAMLRQGVIP  
 OsDsxF4 MSDQQDYETKMDLNASSTSSSPRTFPNCARCRNHRVKVPLKGHKRYCKYRHCKCEKCRLTSEQRVMAKQTALRRAQAQDEAMLRQGVIP  
 OsDsxF5 MSDQQDYETKMDLNASSTSSSPRTFPNCARCRNHRVKVPLKGHKRYCKYRHCKCEKCRLTSEQRVMAKQTALRRAQAQDEAMLRQGVIP  
 OtDsxF1 MSDQQDYETKMDLNASSTSSSPRTFPNCARCRNHRVKVPLKGHKRYCKYRHCKCEKCRLTSEQRVMAKQTALRRAQAQDEAMLRQGVIP  
 OtDsxF2 MSDQQDYETKMDLNASSTSSSPRTFPNCARCRNHRVKVPLKGHKRYCKYRHCKCEKCRLTSEQRVMAKQTALRRAQAQDEAMLRQGVIP  
 OtDsxF3 MSDQQDYETKMDLNASSTSSSPRTFPNCARCRNHRVKVPLKGHKRYCKYRHCKCEKCRLTSEQRVMAKQTALRRAQAQDEAMLRQGVIP  
 OtDsxF4 MSDQQDYETKMDLNASSTSSSPRTFPNCARCRNHRVKVPLKGHKRYCKYRHCKCEKCRLTSEQRVMAKQTALRRAQAQDEAMLRQGVIP  
 OtDsxF5 MSDQQDYETKMDLNASSTSSSPRTFPNCARCRNHRVKVPLKGHKRYCKYRHCKCEKCRLTSEQRVMAKQTALRRAQAQDEAMLRQGVIP  
 OtDsxF5 MSDQQDYETKMDLNASSTSSSPRTFPNCARCRNHRVKVPLKGHKRYCKYRHCKCEKCRLTSEQRVMAKQTALRRAQAQDEAMLRQGVIP

OsDsxF1 QSKSPVPLYNGPDRTYECESPGSSSTPTFPDVVRKAPMEPIRDNLGNNNIGQKDLIQESLQLEKFRYSWEMMPLIYAIVKDTPDLEEAS  
 OsDsxF2 QSKSPVPLYNGPDRTYECESPGSSSTPTFPDVVRKAPMEPIRDNLGNNNIGQKDLIQESLQLEKFRYSWEMMPLIYAIVKDTPDLEEAS  
 OsDsxF3 QSKSPVPLYNGPDRTYECESPGSSSTPTFPDVVRKAPMEPIRDNLGNNNIGQKDLIQESLQLEKFRYSWEMMPLIYAIVKDTPDLEEAS  
 OsDsxF4 QSKSPVPLYNGPDRTYECESPGSSSTPTFPDVVRKAPMEPIRDNLGNNNIGQKDLIQESLQLEKFRYSWEMMPLIYAIVKDTPDLEEAS  
 OsDsxF5 QSKSPVPLYNGPDRTYECESPGSSSTPTFPDVVRKAPMEPIRDNLGNNNIGQKDLIQESLQLEKFRYSWEMMPLIYAIVKDTPDLEEAS  
 OtDsxF1 QSKSPAPLHSGPDRTYECESPGSSSTPTFPDVVRKAPMEPIRDNLGNNNIGQKDLIQESLQLEKFRYSWEMMPLIYAIVKDTPDLEEAS  
 OtDsxF2 QSKSPAPLHSGPDRTYECESPGSSSTPTFPDVVRKAPMEPIRDNLGNNNIGQKDLIQESLQLEKFRYSWEMMPLIYAIVKDTPDLEEAS  
 OtDsxF3 QSKSPAPLHSGPDRTYECESPGSSSTPTFPDVVRKAPMEPIRDNLGNNNIGQKDLIQESLQLEKFRYSWEMMPLIYAIVKDTPDLEEAS  
 OtDsxF4 QSKSPAPLHSGPDRTYECESPGSSSTPTFPDVVRKAPMEPIRDNLGNNNIGQKDLIQESLQLEKFRYSWEMMPLIYAIVKDTPDLEEAS  
 OtDsxF5 QSKSPAPLHSGPDRTYECESPGSSSTPTFPDVVRKAPMEPIRDNLGNNNIGQKDLIQESLQLEKFRYSWEMMPLIYAIVKDTPDLEEAS  
 OtDsxF5 QSKSPAPLHSGPDRTYECESPGSSSTPTFPDVVRKAPMEPIRDNLGNNNIGQKDLIQESLQLEKFRYSWEMMPLIYAIVKDTPDLEEAS

OsDsxF1 KRIDEGQRAVKEYSIINNLNMYDGGELRYPHKAQERRSSGNFKPIGGVNLQRLTIQTWLYHKKNDPALTKSIITINLK-----KIKDRFHLWS  
 OsDsxF2 KRIDEGQRAVKEYSIINNLNMYDGGELRYPHKAQERRSSGNFKPIGGVNLQVK-DF-----  
 OsDsxF3 KRIDEGQRAVKEYSIINNLNMYDGGELRYPHKAQERRSSGNFKPIGGVNLQVKGNLHRLTIQTWLY-----  
 OsDsxF4 KRIDEGQRAVKEYSIINNLNMYDGGELRYPHKAQERRSSGNFKPIGGVNLQVKGNLHVK-----  
 OsDsxF5 KRIDEGQRAVKEYSIINNLNMYDGGELRYPTRQYG-----  
 OtDsxF1 KRIDEGQRAVKEYSIINNLNMYDGGELRYPTRQYG-----  
 OtDsxF2 KRIDEGQRAVKEYSIINNLNMYDGGELRYPHKAQERRSSGTFKPIGGVNLQVKNLHVK-----  
 OtDsxF3 KRIDEGQRAVKEYSIINNLNMYDGGELRYPHKAQERRSSGTFKPIGGVNLQKLDLDF-----  
 OtDsxF4 KRIDEGQRAVKEYSIINNLNMYDGGELRYPHKAQERRSSGTFKPIGGVNLQIFSV-----  
 OtDsxF5 KRIDEGQRAVKEYSIINNLNMYDGGELRYPHKAQERRSSGTFKPIGGVNLQ-----RLMIQTWLY-----  
 OtDsxF5 KRIDEGQRAVKEYSIINNLNMYDGGELRYPHKAQERRSSGTFKPIGGVNLQ-----RLMIQTWLY-----KIKDRFHLWS



|                |                                                                                                   |
|----------------|---------------------------------------------------------------------------------------------------|
| <b>OsDsxM</b>  | <b>KMISLIHVILKNSKDDQEKAFRQIDEAYLEVQALAKYYPTPVNLITDPWRWYSPTALYPAMYQLPNTLLGNIPPSPPLHSPVPPRPRSRA</b> |
| <b>OsDsxF1</b> | -----                                                                                             |
| <b>OsDsxF2</b> | -----                                                                                             |
| <b>OsDsxF3</b> | -----                                                                                             |
| <b>OsDsxF4</b> | -----                                                                                             |
| <b>OsDsxF5</b> | -----                                                                                             |
| <b>OtDsxF1</b> | -----                                                                                             |
| <b>OtDsxF2</b> | -----                                                                                             |
| <b>OtDsxF3</b> | -----                                                                                             |
| <b>OtDsxF4</b> | -----                                                                                             |
| <b>OtDsxF5</b> | -----                                                                                             |
| <b>OtDsxM</b>  | <b>KMISLIHVILKNAKDDQEKAFRQIDEAFLEVQALAKYYPTPVNLITDPWRWYSPTALYPAMYQLPNTLLGNIPPSPPLHSPVPPRPRSRA</b> |
