# Supplementary material
Source: PubMed Central journal article supplement (PMC3528601)

Fig. S3

**A**

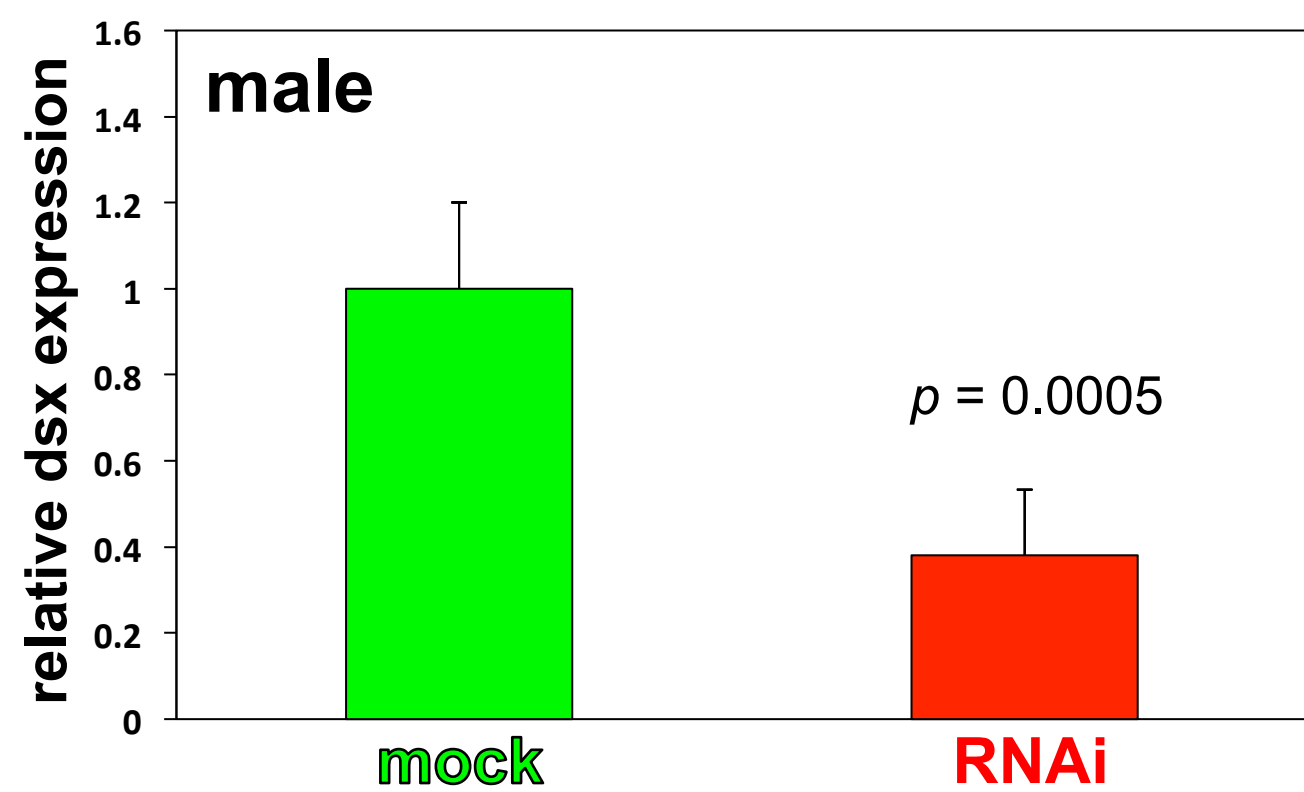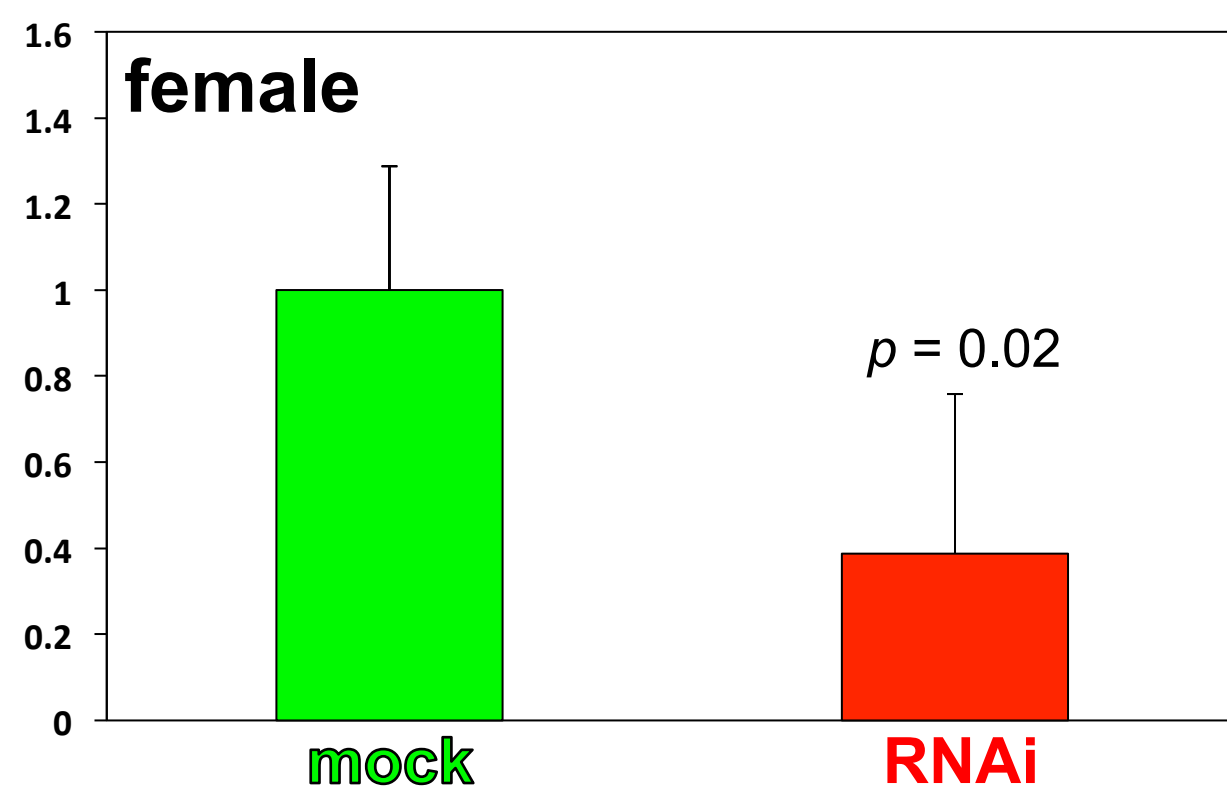

**B**

*O. taurus*

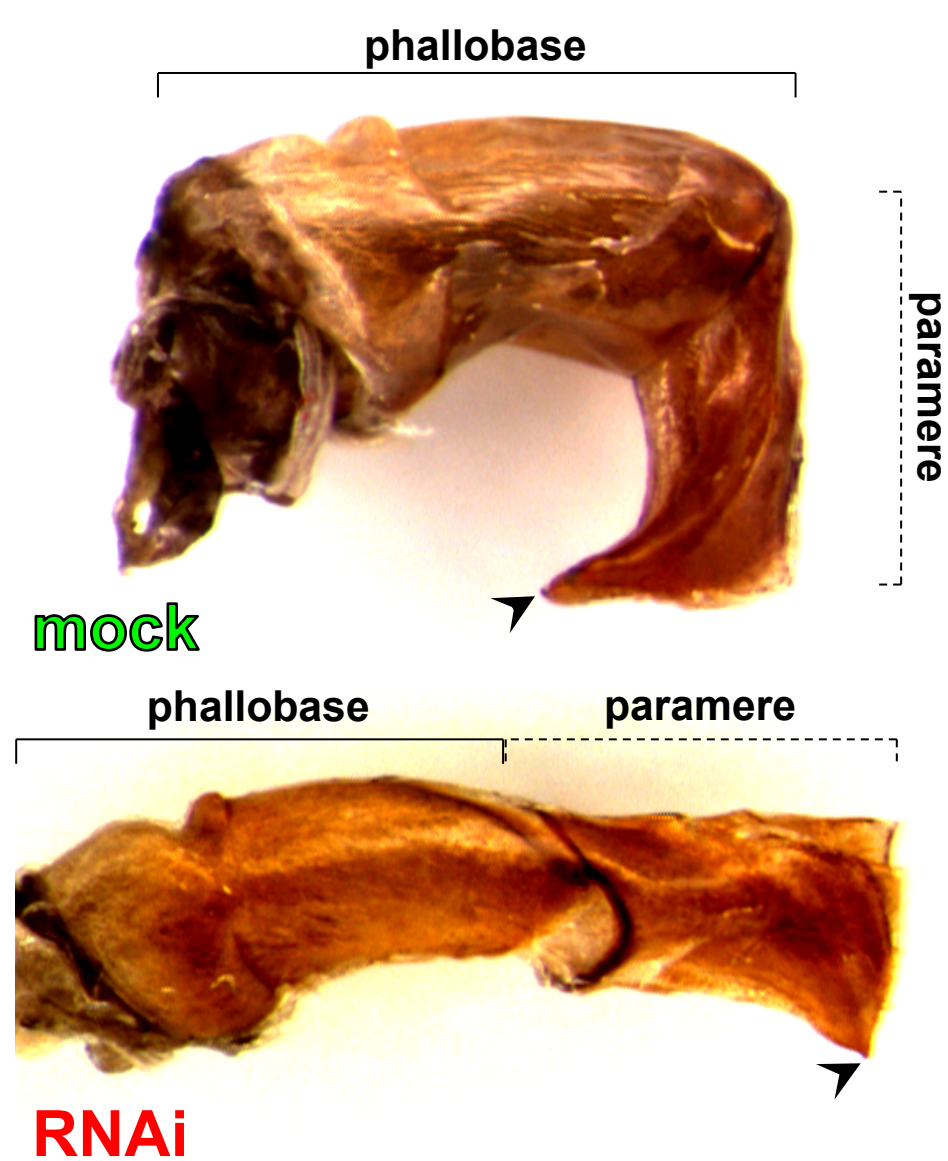

*O. sagittarius*

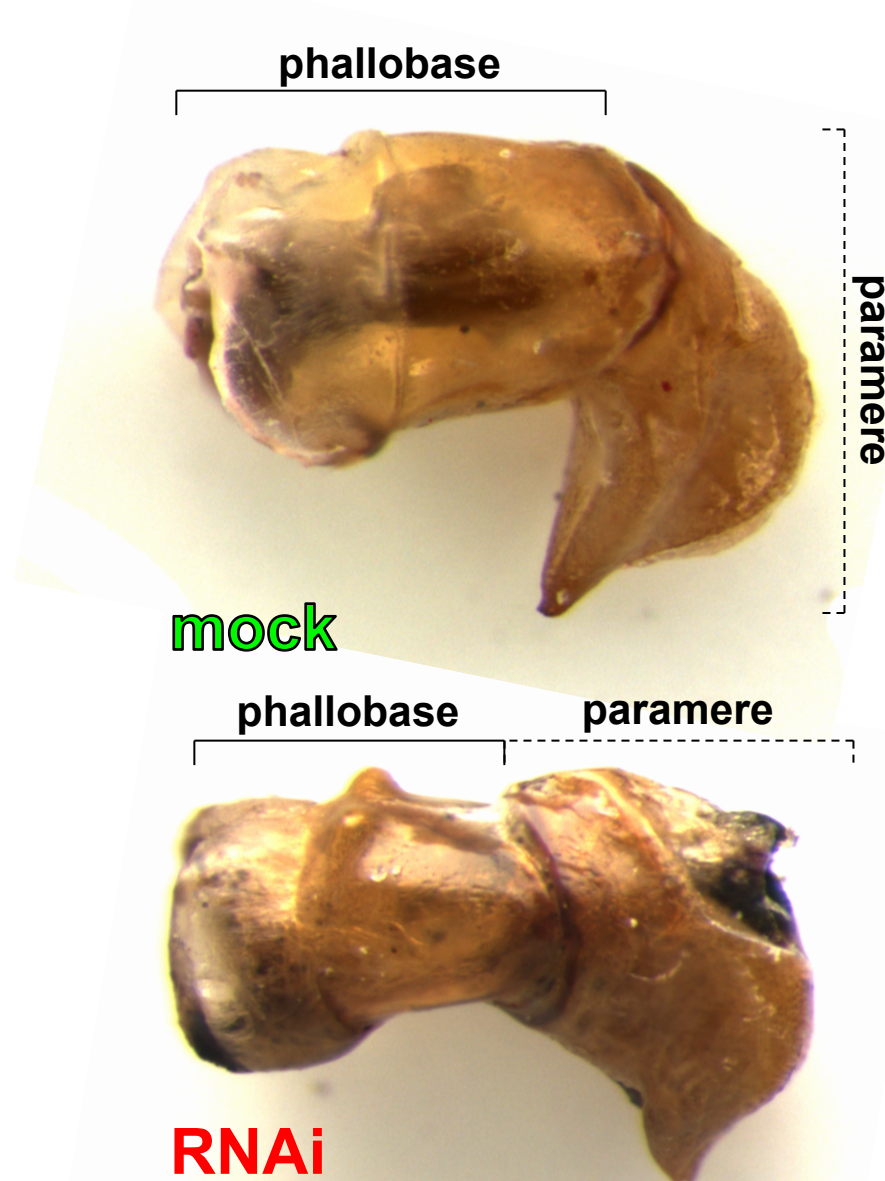

**C**

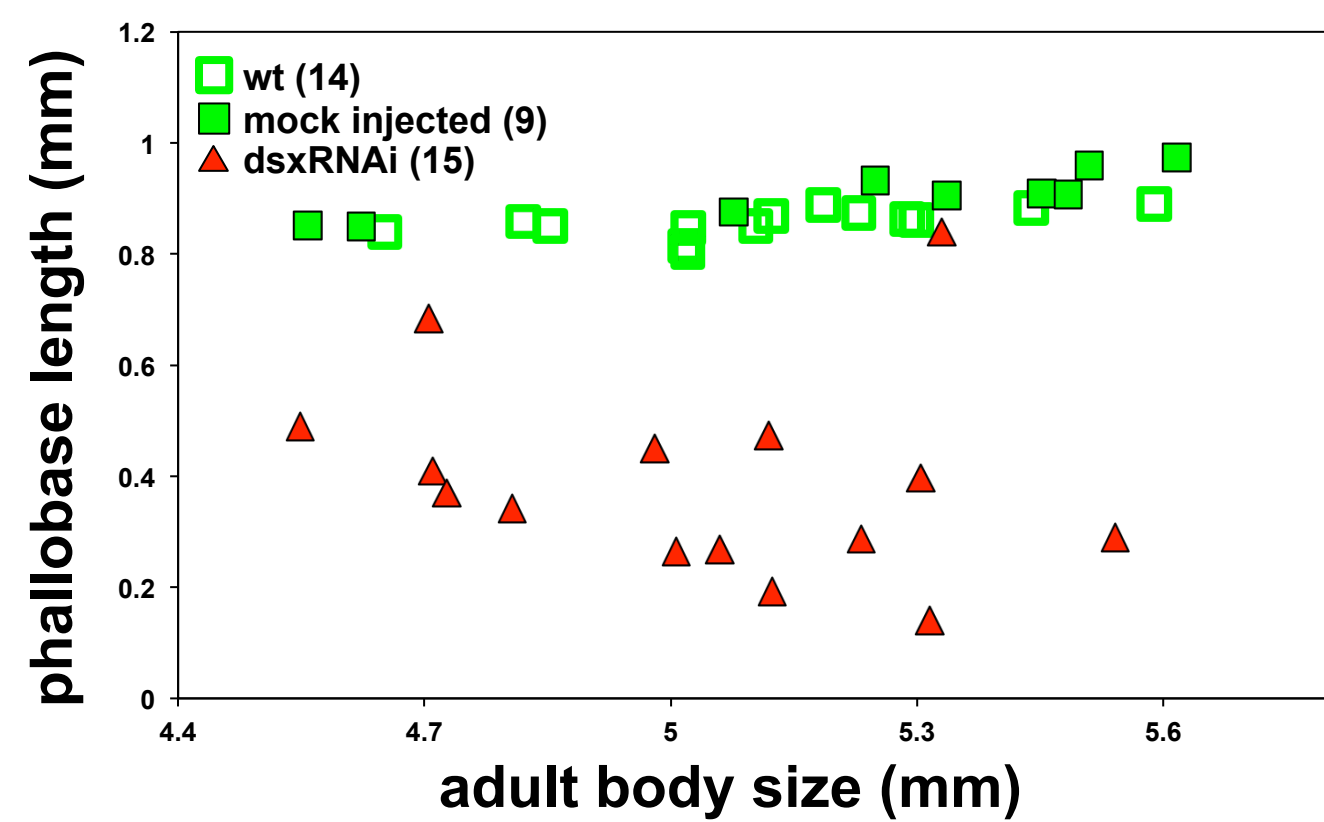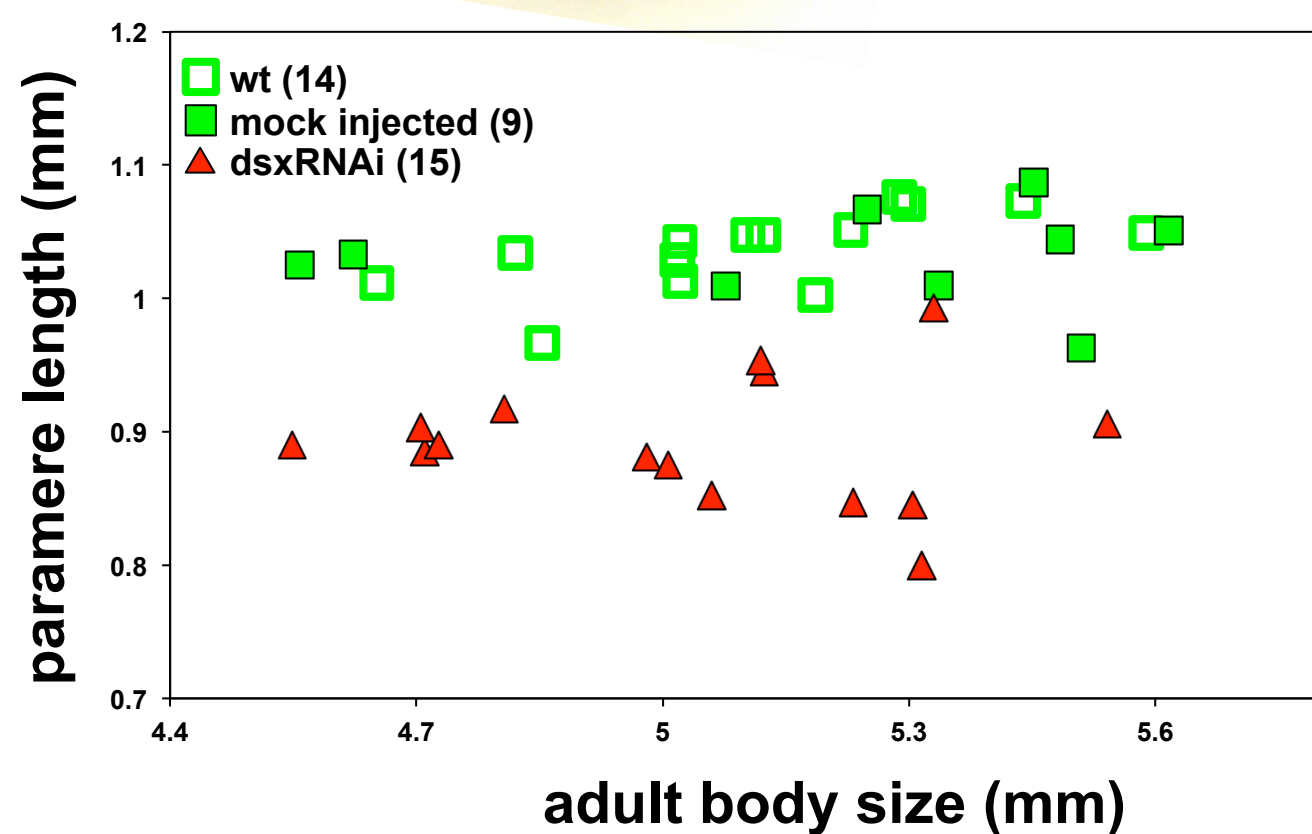

Supplement: 1118589109_sfig03.pdf [file 1118589109_sfig03.pdf]

Fig. S4

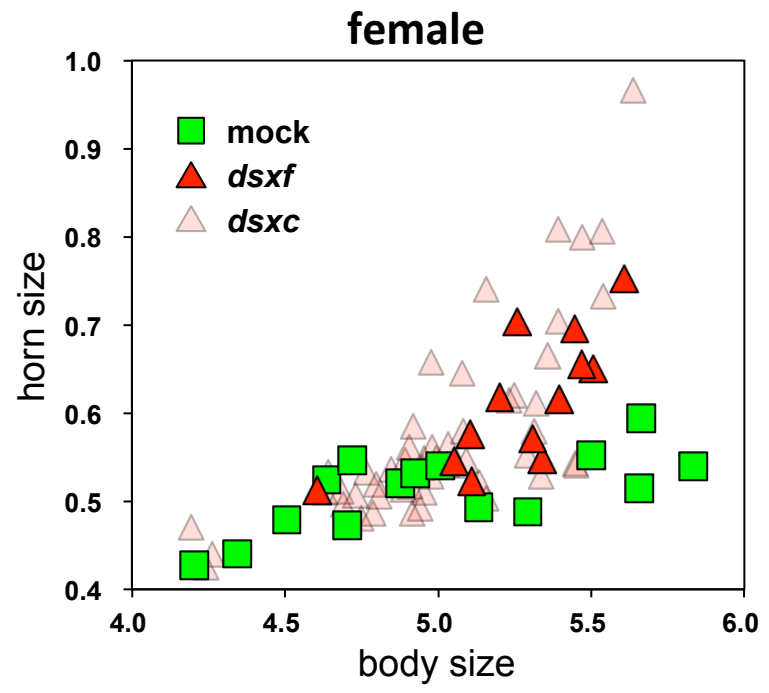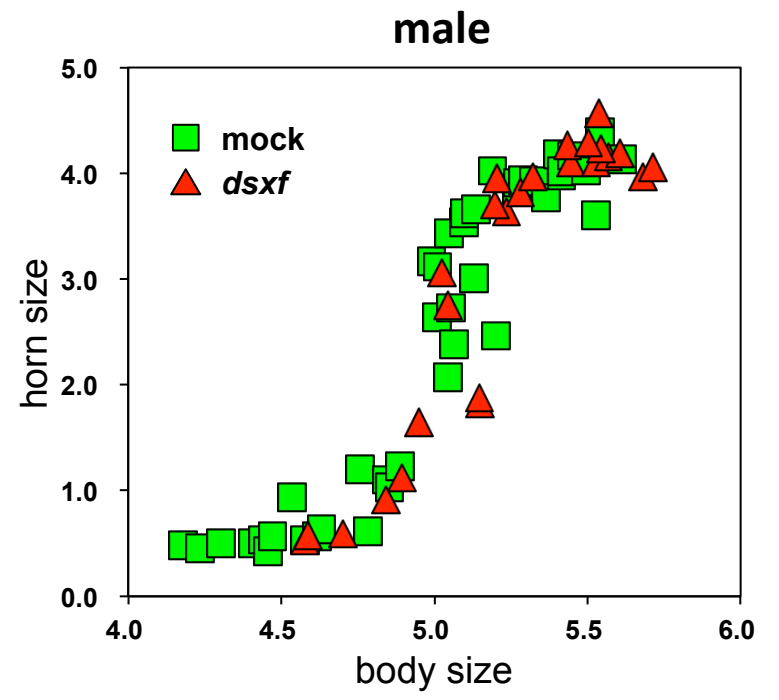

Supplement: 1118589109_sfig04.pdf [file 1118589109_sfig04.pdf]

Fig. S6

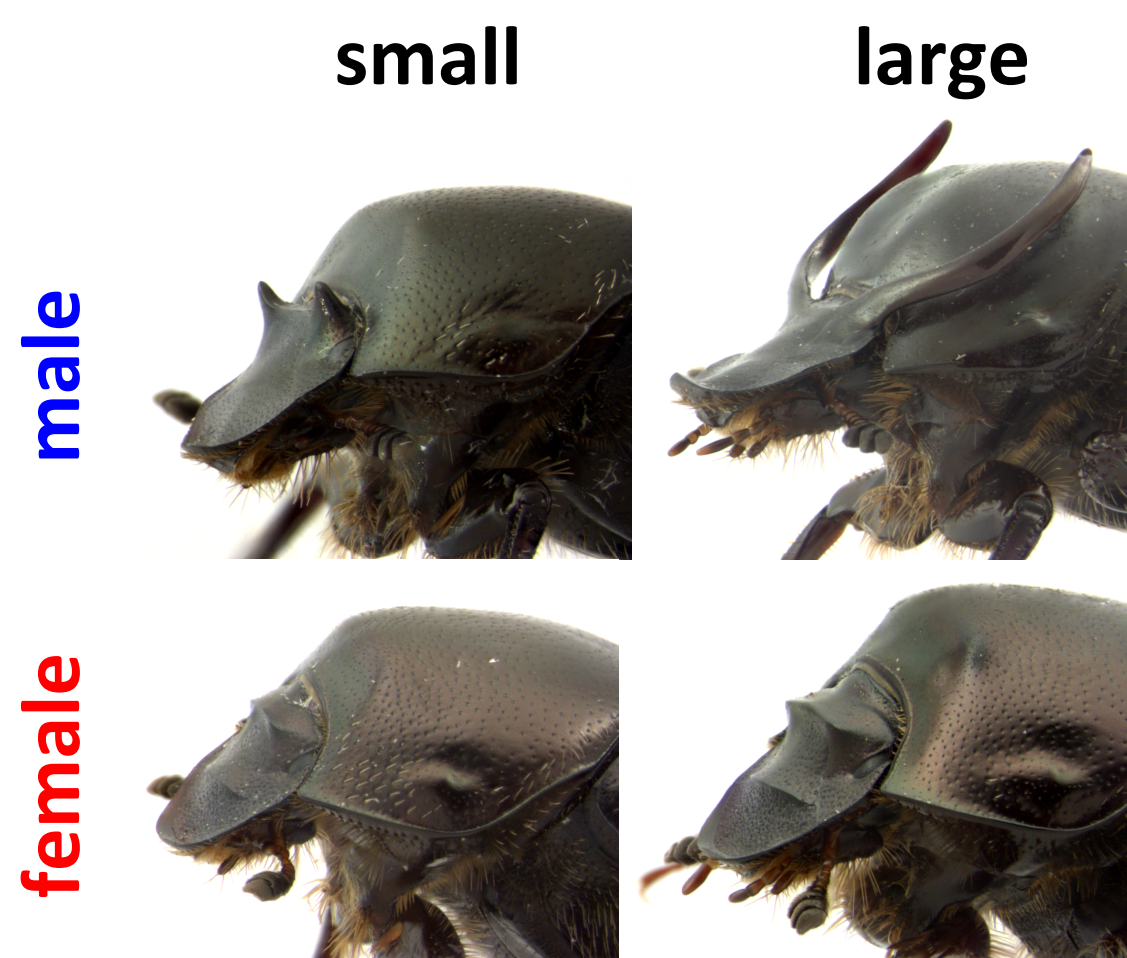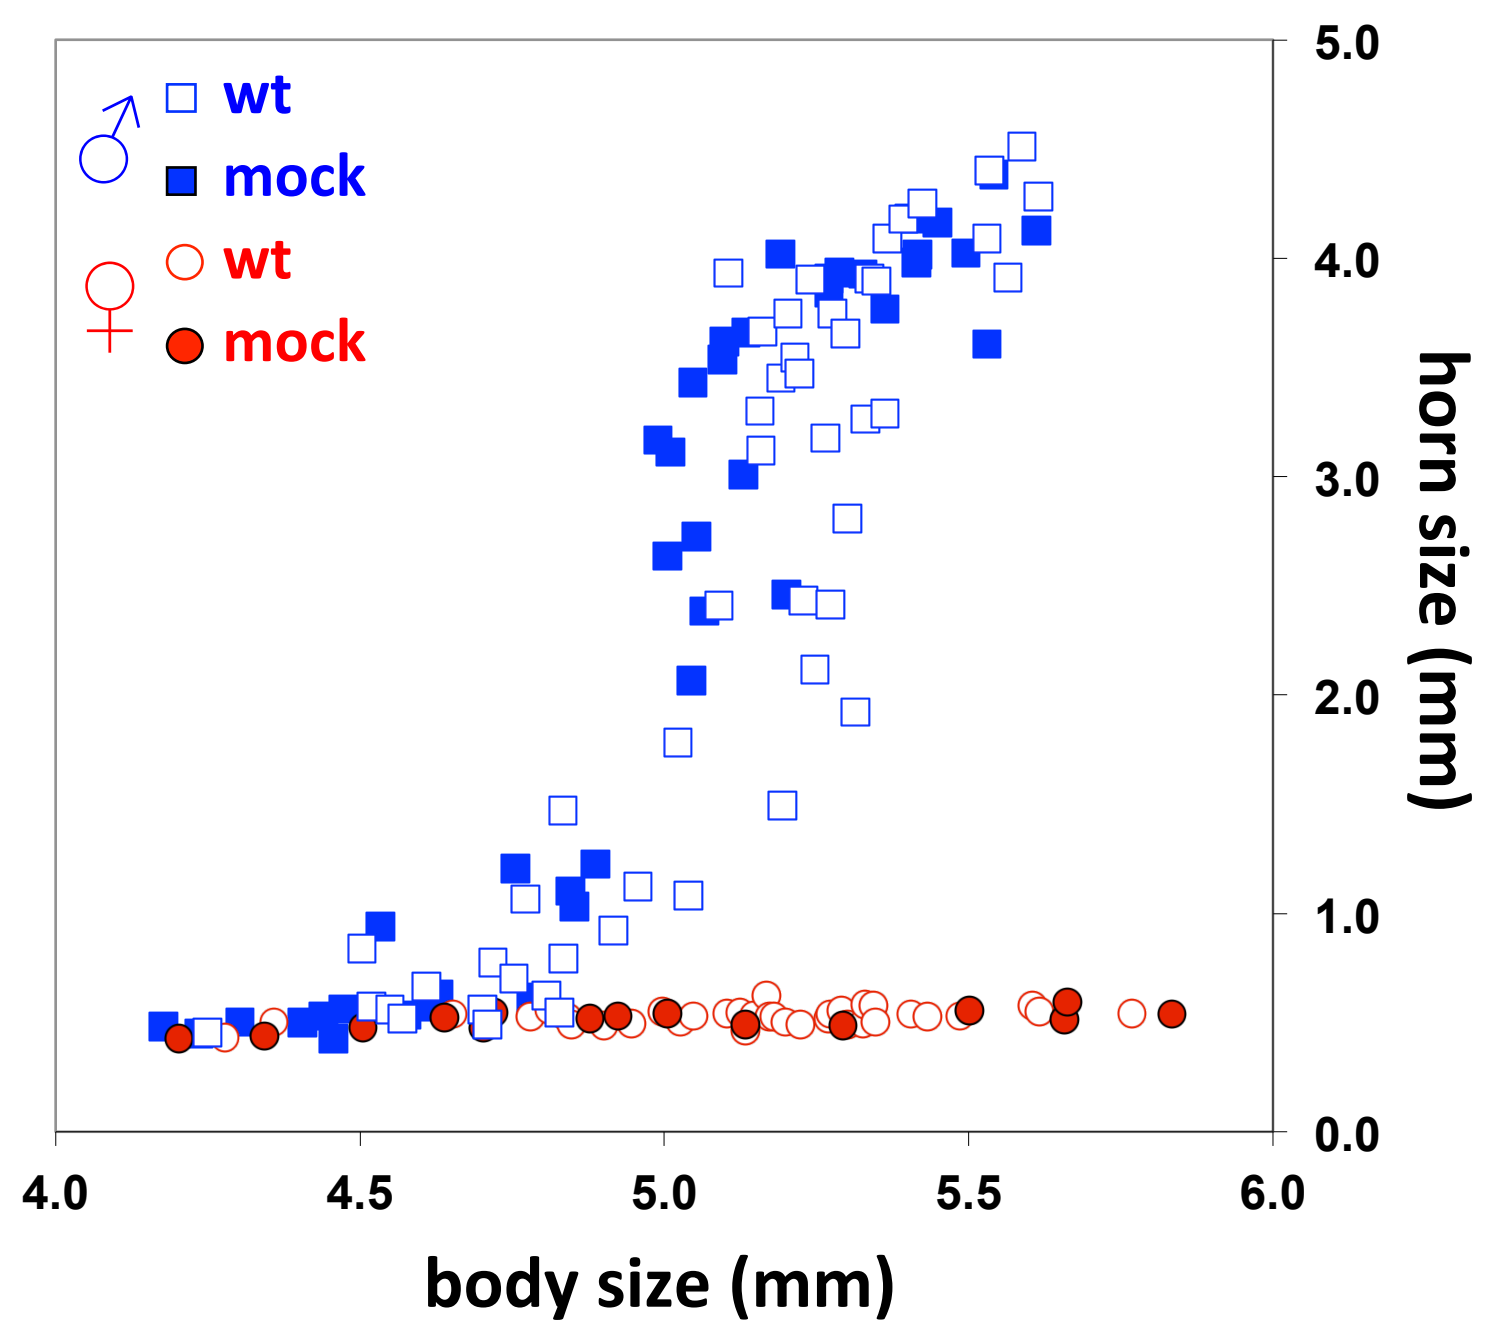

Supplement: 1118589109_sfig06.pdf [file 1118589109_sfig06.pdf]

Fig. S7

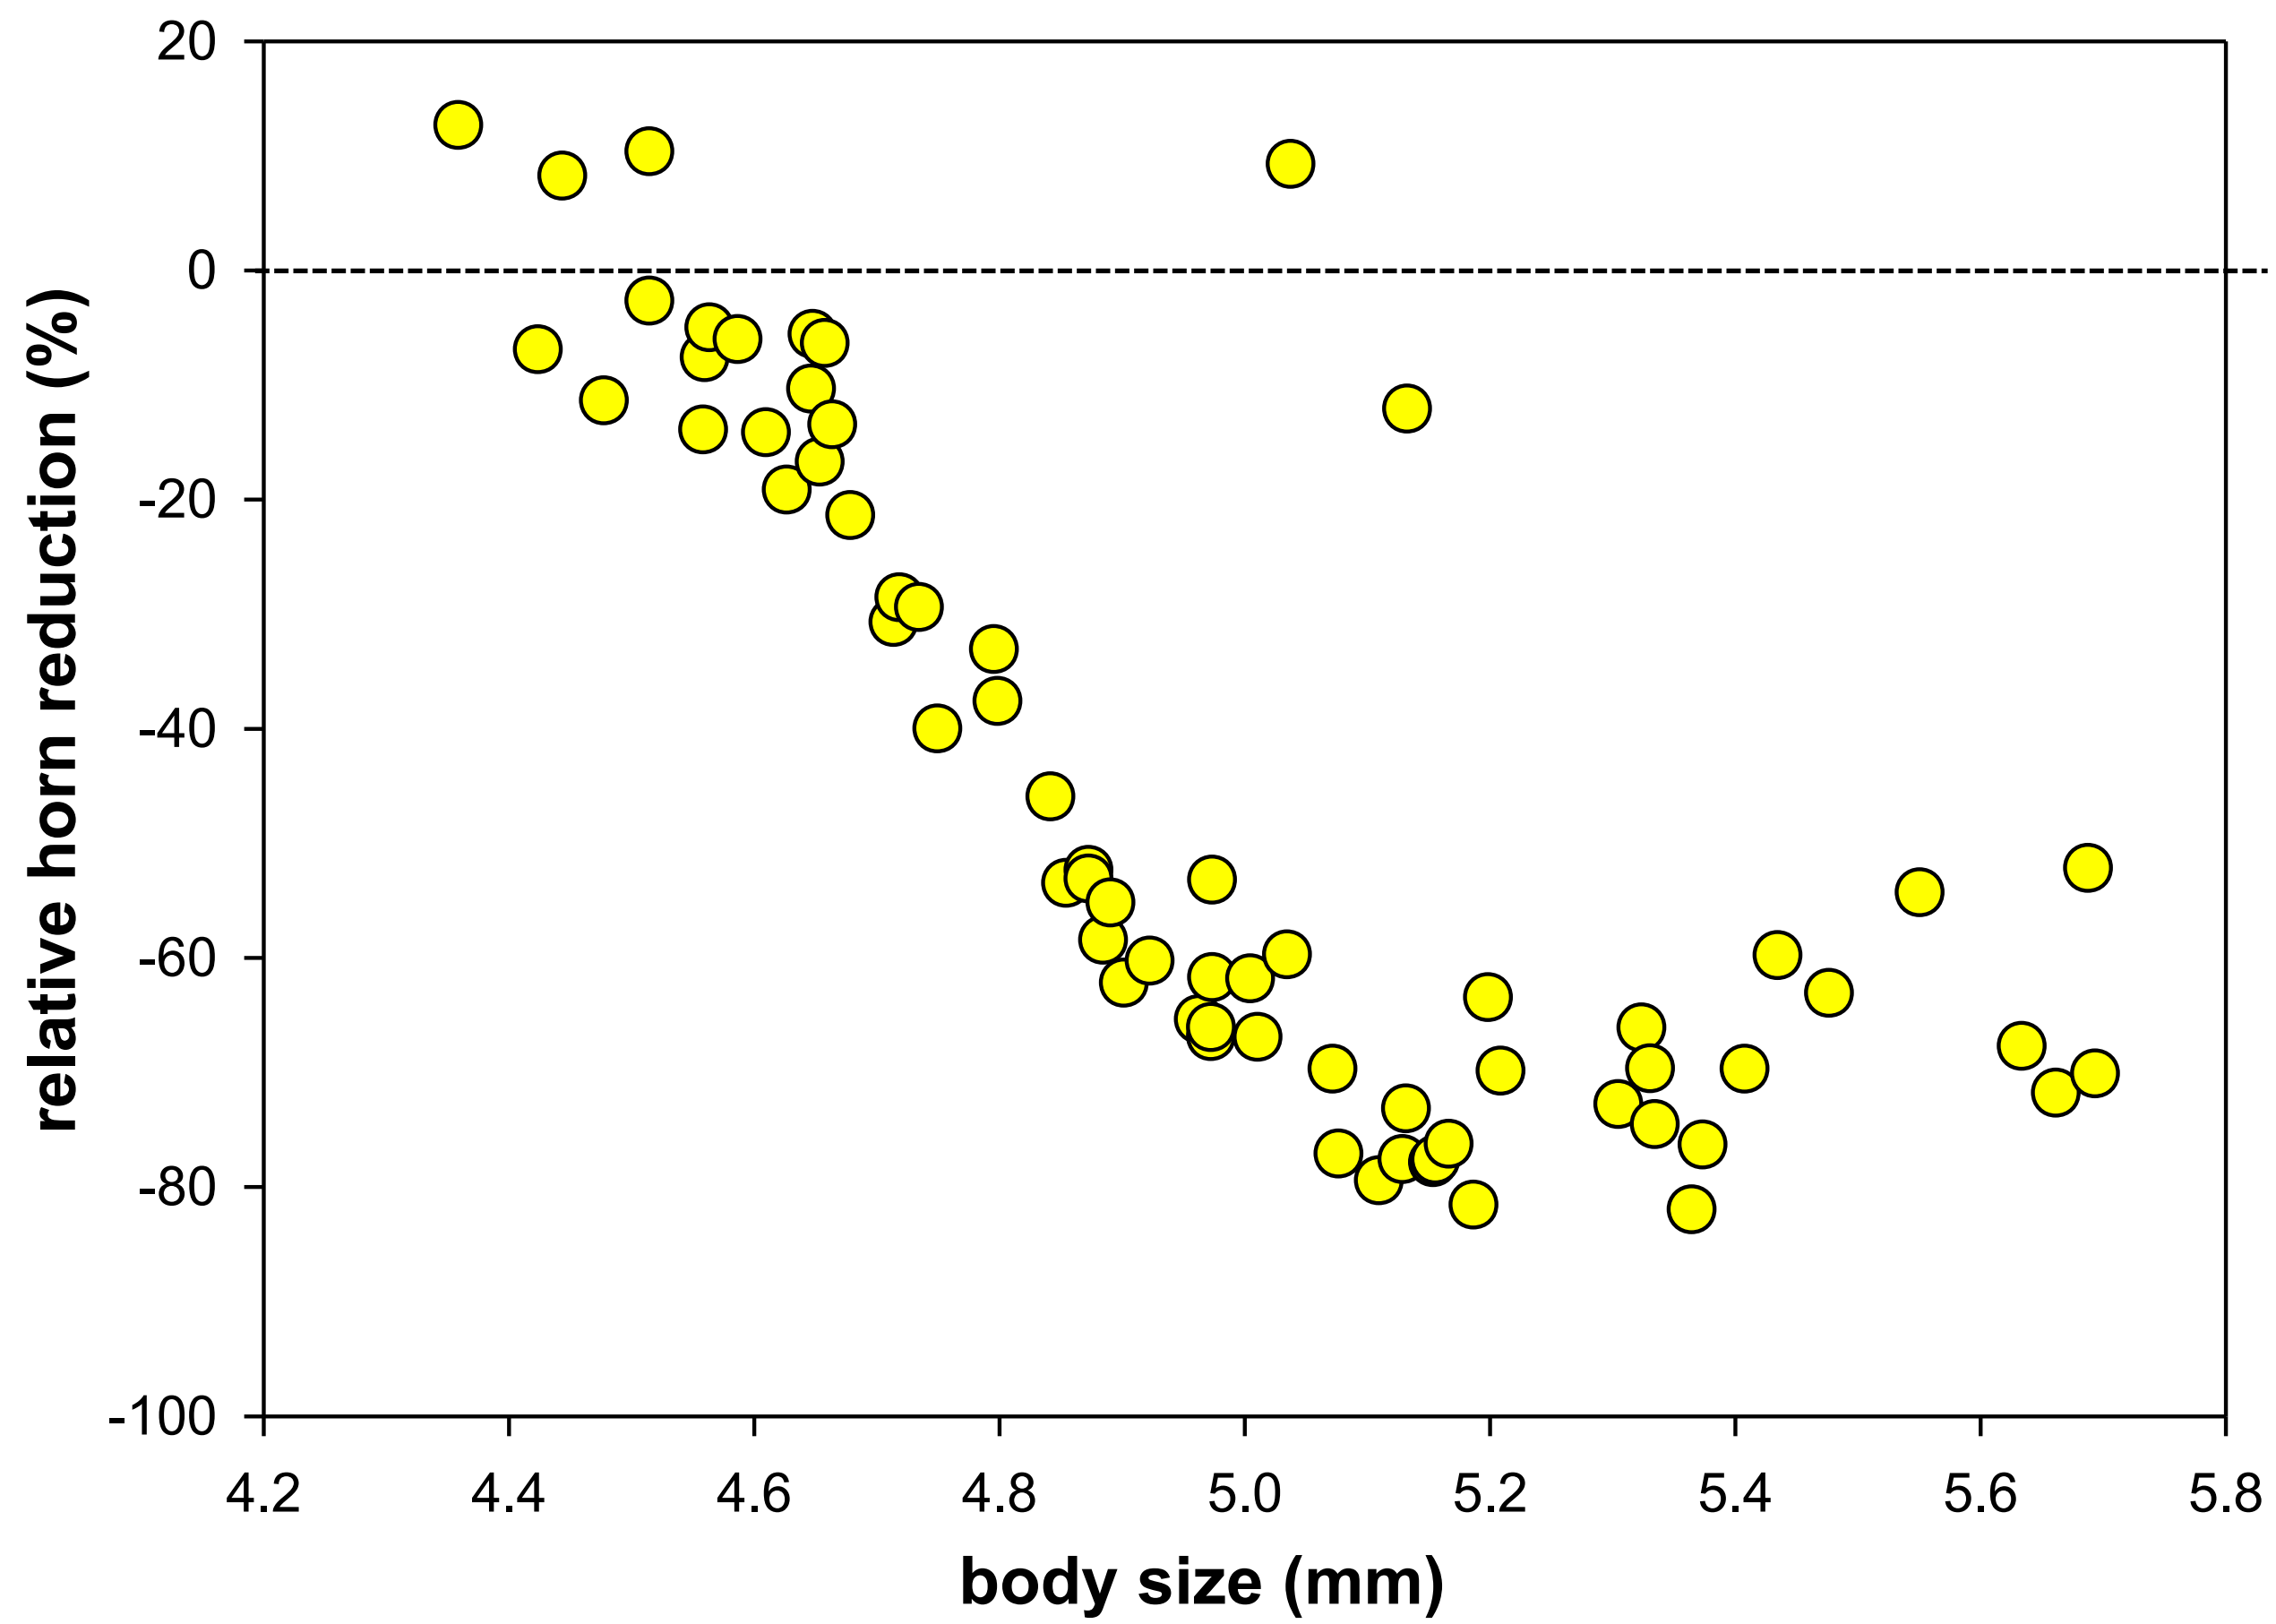

Supplement: 1118589109_sfig07.pdf [file 1118589109_sfig07.pdf]

Fig. S8

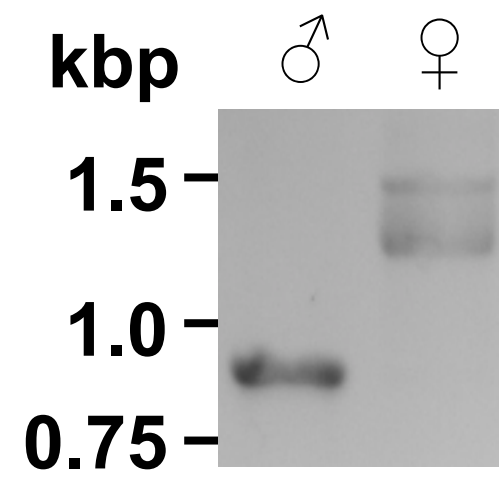

Supplement: 1118589109_sfig08.pdf [file 1118589109_sfig08.pdf]
